# Supplementary material for: A Micropolymorphism Altering the Residue Triad 97/114/156 Determines the Relative Levels of Tapasin Independence and Distinct Peptide Profiles for HLA-A*24 Allotypes
Source: Hindawi journal article supplement (doi:10.1155/2014/298145), 2014-01-01
Supplement: f1 [file 298145.f1.pdf]

## Supplementary Table 1:

### HLA-B\*24:02 derived self peptides

origin: LCL 721.221 cells / Low binding peptides (before TFA)

#### Peptide position

1 2 3 4 5 6 7 8 9 10 11 12 14 15 16 17 18 19 20

#### Ligands

R Y V P R A S Y  
R I S P D R V Y  
K Y P S P F F V  
T M S A L I L T  
I Y V L P M L T  
Y A E K L H R L  
Y S K Q M Q R F  
S Y Q K V I E L  
L E K S F Y Q F  
N Y I E K V V A I  
A Y V H M V T H F  
T Y G E I F E K F  
N Y G R V F S E W  
V Y G P L P Q S F  
K Y I S K P E N L  
K Y A H M I N G F  
K Y V E R I H Y I  
E Y L K L L H S F  
I Y I K H P H L F  
K Y P L L I S R I  
Y Y Q D T P K Q I  
F Y H K Y F N Y L  
K Y K G I F N G F  
K Y I D Q K F V L  
A Y H N S P A Y L  
F D L D Y G F Q R  
V Y V Q N V V K L  
V Y V S R P S H F  
S Y I A L P L T L  
I L G P P P P S F  
I Y I K Q I K T F  
I Y A P P L P S L

#### Source

G1/S-specific cyclin-D3  
Macrophage migration inhibitory factor  
ATP-dependent RNA helicase A  
Carboxypeptidase D  
Leu-tRNA ligase, cytoplasmic  
Dystonin  
Histone deacetylase 2  
Lymphokine-activated killer T-cell-originated prot. kinase  
Superkiller viralicidic activity 2-like 2  
Abl interactor 1  
Bax inhibitor 1  
NADH dehydrogenase [ubiquinone] 1 subunit C2  
Sorting nexin-4  
Cytochrome c oxidase subunit 4 isof. 1  
Calcium-bind. prot. 39  
Adenylosuccinate synthetase isozyme 2  
Heme oxygenase 2  
Sterol regulatory element-bind. prot. 2  
Deoxynucleotidyltransferase terminal-interacting prot. 1  
Rho guanine nucleotide exchange factor 2  
Nucleolar prot. 16  
Exostosin-2  
Phosphate carrier prot., mitochondrial  
Ser/thr-prot. phosphatase 2A 56 kDa reg. subunit  $\delta$  isof.  
SWI/SNF-related matrix-associated actin-dependent regulator  
Heterogeneous nucl. ribonucleoprot. C-like 1  
AP-3 complex subunit  $\delta$ -1  
Signal transducer and activator of transcription 2  
Nodal modulator 2  
Matrin-3  
Retinoblastoma-like prot. 2  
A-kinase anchor prot. 1

|   |   |   |   |   |   |   |   |   |                                                             |                                                                       |
|---|---|---|---|---|---|---|---|---|-------------------------------------------------------------|-----------------------------------------------------------------------|
| K | Y | I | Q | R | Q | E | T | I | Interferon-induced GTP-bind. prot. Mx1                      |                                                                       |
| V | Y | I | H | H | F | D | R | I | MOB kinase activator 3A                                     |                                                                       |
| V | F | K | E | K | H | H | S | W | Ribonuclease H2 subunit B                                   |                                                                       |
| E | Y | V | E | K | F | Y | R | I | DNA repair prot. RAD50                                      |                                                                       |
| P | Q | P | D | V | F | P | L | F | Prot. AATF                                                  |                                                                       |
| A | Y | I | N | K | V | E | E | L | Acyl-CoA-bind. prot.                                        |                                                                       |
| R | Y | I | A | N | T | V | E | L | Dolichyl-diphosphooligosaccharide-prot. Glycosyltr. sub. 2  |                                                                       |
| K | Y | P | D | R | V | P | V | I | $\gamma$ -aminobutyric acid receptor-associated prot.       |                                                                       |
| H | Y | V | E | K | P | S | T | F | Mannose-1-phosphate guanyltransferase $\alpha$              |                                                                       |
| N | Y | V | Q | A | V | E | E | F | Nucl. autoantigenic sperm prot.                             |                                                                       |
| V | Y | V | V | G | T | A | H | F | TraB domain-containing prot.                                |                                                                       |
| V | Y | V | K | H | S | I | S | F | AP-3 complex subunit mu-1                                   |                                                                       |
| I | Y | G | E | K | T | Y | A | F | Serpin B10                                                  |                                                                       |
| N | Y | I | G | L | I | N | R | I | Interf.-induced, double-stranded RNA-activated prot. kinase |                                                                       |
| R | Y | F | K | G | P | E | L | L | Casein kinase II subunit $\alpha$                           |                                                                       |
| L | Y | T | E | K | F | E | E | F | $\alpha$ -taxilin                                           |                                                                       |
| R | Y | Q | K | S | T | E | L | L | Histone H3.1t                                               |                                                                       |
| T | Y | I | Q | K | I | F | R | M | Peroxisomal acyl-coenzyme A oxidase 3                       |                                                                       |
| N | Y | T | L | V | S | H | L | I | Methionine-tRNA ligase, cytoplasmic                         |                                                                       |
| V | F | P | E | K | G | Y | S | F | Nucleolysin TIAR                                            |                                                                       |
| S | Y | L | P | I | S | P | T | F | Solute carrier family 23 member 2                           |                                                                       |
| N | Y | G | V | L | H | V | T | F | NACHT, LRR and PYD domains-containing prot. 11              |                                                                       |
| G | Y | I | H | V | T | Q | T | F | Prot. NKG7                                                  |                                                                       |
| E | E | T | I | E | K | M | Q | E | 60S ribosomal prot. L26                                     |                                                                       |
| R | Y | V | K | K | L | G | D | F | Squalene synthase                                           |                                                                       |
| K | F | I | D | P | I | Y | Q | V | RNA polymer. I-specific transcription initiation factor     |                                                                       |
| E | Y | A | T | K | I | S | R | F | PITH domain-containing prot. 1                              |                                                                       |
| K | Y | I | H | S | A | N | V | L | Mitogen-activated prot. kinase 1                            |                                                                       |
| I | Y | K | P | V | T | D | F | F | Leu-rich PPR motif-containing prot., mitochondrial          |                                                                       |
| K | Y | Q | K | G | F | S | L | W | Translocating chain-associated membrane prot. 1             |                                                                       |
| K | Q | A | L | K | Y | F | N | L | Prot. sel-1 homolog 1                                       |                                                                       |
| I | Y | P | E | L | Q | I | E | R | F                                                           | Amyloid $\beta$ A4 precursor prot.-bind. fam. B member                |
| R | Y | F | D | P | A | N | G | K | F                                                           | Elongation factor 2                                                   |
| I | S | L | K | Q | A | P | L | V | H                                                           | Clathrin light chain A                                                |
| I | Y | I | S | T | L | K | T | E | F                                                           | Activator of 90 kDa heat shock prot. ATPase homolog 1                 |
| I | Y | A | D | N | Q | V | M | H | F                                                           | DNA polymer. $\epsilon$ catalytic subunit A                           |
| I | Y | D | P | N | L | A | F | L | R                                                           | 1-phosphatidylinositol 4,5-bisphosphate phosphodiesterase $\gamma$ -2 |
| R | Y | S | G | V | N | Q | S | M | L                                                           | ATPase family AAA domain-containing prot. 2                           |
| L | Y | A | D | V | G | G | K | Q | F                                                           | Translocon-associated prot. subunit $\delta$                          |
| I | Y | N | G | K | L | F | D | L | L                                                           | Kinesin-like prot. KIF2C                                              |
| Y | Y | M | K | D | L | P | T | S | F                                                           | Phosphatidylinositol 4-kinase $\alpha$                                |

|                                         |                                                   |
|-----------------------------------------|---------------------------------------------------|
| Y Y S H L E G A R F                     | Nucleolar pre-ribosomal-associated prot. 1        |
| E Y P D R I M N T F                     | Tubulin $\beta$ -2A chain                         |
| V Y P K K E L P F F                     | Suppressor of tumorigenicity 7 prot.              |
| I Y H T G T F A Q I                     | Lon protease homolog, mitochondrial               |
| T Y S P A L N K M F                     | Cellular tumor antigen p53                        |
| V Y P E K L A T K F                     | Proteasome-associated prot. ECM29 homolog         |
| V Y N E N L V H M I                     | Pre-mRNA-splicing factor SPF27                    |
| L P E Y S G I T S L                     | Dynein heavy chain 2                              |
| F Y V P A E P K L A F                   | 60S ribosomal prot. L7                            |
| K Y P S V K V S V F V                   | ATP-dependent RNA helicase DDX39A                 |
| E F G Y S N R V V D L                   | Glyceraldehyde-3-phosphate dehydrogenase          |
| R Y I S P D Q L A D L                   | Alpha-enolase                                     |
| F Y V P A E P K L A F                   | 60S ribosomal prot. L-19                          |
| K Y M P N V K V A V F                   | Spliceosome RNA helicase DDX39B                   |
| K Y I T Q G Q L L Q F                   | Elongation of very long chain fatty acids prot. 5 |
| R Y P T S I A S L A F                   | Mitotic checkpoint protein BUB3                   |
| K Y P G H L A A I T L                   | Actin-related prot. 5                             |
| V Y S P H V L N L T L                   | Dynamin-1                                         |
| I F K P P D P D N T F                   | Modulator of apoptosis 1                          |
| S G P Y G G G G Q Y F                   | Heterogeneous nucl. ribonucleoprot. A1            |
| R Y P D N L K H L Y L                   | Thyroid transcription factor 1-associated prot.   |
| V Y V D L G G S H V F                   | Ribosome biogenesis prot. BMS1 homolog            |
| T Y P E G L E V L H F                   | Centromere prot. J                                |
| I Y L P I A N V A R I                   | Nucl. transcription factor Y subunit $\beta$      |
| A K A D G I V S K N F                   | 40S ribosomal prot. S21                           |
| Y F I D S T N L K T H F                 | Zinc finger prot. 593                             |
| K Y L P Y N H Q H E Y F                 | Fatty acid desaturase 2                           |
| P G V T V K D V N Q Q E                 | 40S ribosomal prot. S19                           |
| V D G E P L G R V S F E                 | Peptidyl-prolyl cis-trans isomer. A               |
| F R D G D I L G K Y V D                 | 10 kDa heat shock prot.                           |
| K I D D I R K P G E S E E               | T-complex prot. 1 subunit $\epsilon$              |
| Y I K S T M G K P Q R L Y               | 60S ribosomal prot. L10a                          |
| A L T N G I Y P H K L V F               | 60S ribosomal prot. L6                            |
| I L E L A G N A A R D N K               | Histone H2A type 2-B                              |
| Y A S G R T T G I V M D S G D           | Actin, cytoplasmic 1                              |
| L E G K V L P G V D A L S N I           | Phosphoglycerate kinase 1                         |
| H A V S E G T K A V T K Y T S S K       | Histone H2B type 1-B                              |
| Q V T Q P T V G M N F K T P R G P V     | 40S ribosomal prot. S17-like                      |
| V T Y V P V T T F K N L Q T V N V D E N | 60S ribosomal prot. L31                           |

origin: LCL 721.221 cells / High binding peptides (after TFA)

**1 2 3 4 5 6 7 8 9 10 11 12 13 14 15 16**  
 S F V I L V A L  
 D Y G I V A D L  
 Y E V S Q L K D  
 G Y S N R V V D L  
 T Y G E I F E K F  
 R Y P T S I A S L  
 A Y V H M V T H F  
 L Y D P V I S K L  
 N Y G R V F S E W  
 K Y I T D V V K L  
 N Y I G L I N R I  
 S Y I E H I F E I  
 V Y V Q N V V K L  
 L Y T E K F E E F  
 I Y K P V T D F F  
 E E T I E K M Q E  
 Q S V A Y L A A L L  
 L Y L K V K G N V F  
 V Y A A G K A E R T L  
 V Y V D L G G S H V F  
 I L E L A G N A A R D N K  
 F Q I N Q D E E E E E D E D  
 I K P S V E P S A G H D E L  
 Y A S G R T T G I V M D S G D  
 H A V S E G T K A V T K Y T S S

Solute carrier family 12 member 8  
 Electron transfer flavoprotein subunit  $\alpha$ , mitochondrial  
 Cytosolic non-specific dipeptidase  
 Glyceraldehyde-3-phosphate dehydrogenase  
 NADH dehydrogenase [ubiquinone] 1 subunit C2  
 Mitotic checkpoint prot. BUB3  
 Bax inhibitor 1  
 Microspherule prot. 1  
 Sorting nexin-4  
 Small subunit processome component 20 homolog  
 Interferon-induced, RNA-activated prot. kinase  
 Astrocytic phosphoprot. PEA-15  
 AP-3 complex subunit  $\delta$ -1  
 Alpha-taxilin  
 Leu-rich PPR motif-containing prot., mitochondrial  
 60S ribosomal prot. L26  
 Neurofibromin  
 60S ribosomal prot. L19  
 Voltage-gated potassium channel subunit  $\beta$ -3  
 Ribosome biogenesis prot. BMS1  
 Histone H2A type 2-A  
 60S ribosomal prot. L22  
 Stromal cell-derived factor 2-like prot. 1  
 Actin, cytoplasmic 1  
 Histone H2B type 1-A

**origin: LCL 721.220 cells / Low binding peptides (before TFA)**

**1 2 3 4 5 6 7 8 9 10 11 12 13 14 15 16 17 18 19**  
 V T L E G V P A  
 I I G N S T V I  
 V D V E P K V K S  
 K F I D T T S K F  
 V Y I K H P V S L  
 I L E A G N A A R D  
 R V A P E E H P V L  
 F S Q F G P I E R A  
 I S L K Q A P L V H  
 L Y L K V K G N V F

Intercellular adhesion molecule 5  
 Melanin-concentrating hormone receptor 1  
 Small nucl. ribonucleoprot. Sm D1  
 60S ribosomal prot. L3  
 26S proteasome non-ATPase regulatory subunit 8  
 Histone H2A type 2-A  
 Actin, cytoplasmic 1  
 Splicing factor, pro- and gln-rich  
 Clathrin light chain A  
 60S ribosomal prot. L19

|                                       |                                                         |
|---------------------------------------|---------------------------------------------------------|
| I Y N G K L F D L L                   | Kinesin-like prot. KIF2C                                |
| L Y L K V K G N V F                   | 60S ribosomal prot. L-7                                 |
| V Y N E N L V H M I                   | Pre-mRNA-splicing factor SPF27                          |
| A A V L E Y L T A E                   | Histone H2A type 2-B                                    |
| I L E L A G N A A R D                 | Histone H2A type 1-J                                    |
| V L E L A G N A S K D                 | Histone H2A.V                                           |
| F H E T L Y Q K A D D                 | Fructose-bisphosphate aldolase A                        |
| V S E K G T V Q Q A D E               | 60S ribosomal prot. L9                                  |
| A L T N G I Y P H K L V               | 60S ribosomal prot. L6                                  |
| N E F G Y S N R V V D L               | Glyceraldehyde-3-phosphate dehydrogenase                |
| F R D G D I L G K Y V D               | 10 kDa heat shock prot., mitochondrial                  |
| V T Y V P V T T F K N L               | 60S ribosomal prot. L31                                 |
| I I R S M P E Q T G E K               | 60S ribosomal prot. L30                                 |
| A Q E E P V A A P E P K               | Ser/arg repetitive matrix prot. 1                       |
| P G V T V K D V N Q Q E               | 40S ribosomal prot. S19                                 |
| F S L P I K E S E I I D               | 40S ribosomal prot. S2                                  |
| I K S T M G K P Q R L Y               | 60S ribosomal prot. L10a                                |
| L S Q Q A Q L A A A E K F             | Nascent polypeptide-associated complex subunit $\alpha$ |
| R F Q S S A V M A L Q E A             | Probable tubulin polyglutamylase TTLL2                  |
| M I R E A D I D G D G Q V N           | Calmodulin                                              |
| F Q I N Q D E E E E E D E D           | 60S ribosomal prot. L22                                 |
| E V V V T E I P K E E E K D           | 60 kDa heat shock prot., mitochondrial                  |
| I K P S V E P S A G H D E L           | Stromal cell-derived factor 2-like prot. 1              |
| A S T L Q S Q K A E G T G D A         | nucleosome-bind. domain-containing prot. 4              |
| F A L P V S G M D K P V F T D         | Peptidyl-prolyl cis-trans isomer. NIMA-interacting 4    |
| L V S N L N P E R V T P Q S L         | Polypyrimidine tract-bind. prot. 1                      |
| V L D Q Q Q T P S R L A V T R         | Leu-rich PPR motif-containing prot., mitochondrial      |
| G F G D L K S P A G L Q V L N D       | Elongation factor 1- $\beta$                            |
| I K D D E K E A E E G E D D R D       | Heterogeneous nucl. ribonucleoprot. C-like 1            |
| P K R K A E G D A K G D K A K V K D   | Non-histone chromosomal prot. HMG-17                    |
| A K H A V S E G T K A V T K Y T S S K | Histone H2B type 1-B                                    |

**origin: LCL 721.220 cells / High binding peptides (after TFA)**

| 1 | 2 | 3 | 4 | 5 | 6 | 7 | 8 | 9 | 10 | 11 | 12 |
|---|---|---|---|---|---|---|---|---|----|----|----|
| I | L | E | L | A | G | N | A | A | R  | D  |    |
| A | Q | E | E | P | V | A | A | P | E  | P  | K  |

Histone H2A type 1-B/E  
Ser/arg repetitive matrix prot. 1

## Supplementary Table 2:

### HLA-B\*24:06 derived self peptides

origin: LCL 721.221 cells / Low binding peptides (before TFA)

#### Peptide position

1 2 3 4 5 6 7 8 9 10 11 12 13 14 15 16 17 18 19 20 21 22 23

#### Ligands

T A G A K L L F  
D Y G I V A D L  
V Y I K H P V S L  
L Y I V H P T M F  
K Y I N T D A K F  
K Y F H P P A H L  
L Y S S K L Y R F  
K F I D T T S K F  
V L P I V I I T F  
I Y K Q D L P S L  
V L P K L Y V K L  
V Y G P L P Q S F  
N Y V P E V S A L  
V Y V Q H P I T F  
T Y Q E V A Q K F  
A F I K I K M A F  
R Y T D V S T R Y  
I F V K I L Q K L  
P Y N A P T V K F  
P Y A G D V S M F  
D Y S S I L Q K F  
K Y I Q R Q E T I  
K L P V T I N K F  
V Y V K H S I S F  
K Y I S K P E N L  
N Y F L D P V T I  
I F S N V R I N L  
N Y I G L I N R I  
D Y V E G L R V F  
I Y V G R V K S F

#### Source

Signal transducer and active. of transcription 2  
Electron transfer flavoprot. subunit  $\alpha$   
26S proteasome non-ATPase regulatory subunit 8  
Rho GTPase-activating prot. 1  
transient receptor channel 4-associated prot.  
Muscleblind-like prot. 2  
BTB/POZ domain-containing prot. KCTD20  
60S ribosomal prot. L3-like  
Transmembrane prot. 111  
Heat shock prot. 105 kDa  
Putative 40S ribosomal prot. S26-like 1  
Cytochr. c oxidase subunit 4 isof. 1, mitoch.  
40S ribosomal prot. S17-like  
Lipopolysaccharide-ind. tumor necrosis  $\alpha$  factor  
Adenosine deaminase CECR1  
Double-strand-break repair prot. rad21 homolog  
Thioredoxin-related transmembrane prot. 2  
Nucl. pore complex prot. Nup133  
Ubiquitin-conjugating enzyme E2 C  
Plasminogen activator inhibitor 2  
Formin-bind. prot. 1  
Interferon-induced GTP-bind. prot. Mx  
AP-2 complex subunit  $\alpha$ -1  
AP-3 complex subunit  $\mu$ -1  
Calcium-bind. prot. 39  
Tripartite motif-containing prot.  
Caveolin-1  
Interf.-ind., double-str. RNA-activ. prot. kinase  
Myosin light polypeptide 6  
Retinoblastoma-like prot. 1

D Y A E T V H Q L  
 K Y T P P P H H I  
 E Y P I V D G K L  
 A Y S D V A K R L  
 V Y P D G I R H I  
 V Y Q H L F T R I  
 V Y I D K V R S L  
 I F H D I S L R F  
 K Y F H P P A H L  
 I F H D I S L R F  
 R Y Q D I I H S I  
 I F V D E V F K I  
 L Y H D I F S R L  
 K Y P D R V P V I  
 S Y I S R T N Q L  
 V I H K I F S K F  
 S Y S Q A V T G F  
 V Y G V V P I S L  
 R F L D D L G L K  
 V F K T T L N E F  
 V Y K E E I S R F  
 Y V I Q K F F E F  
 L Y H A I S N H L  
 T Y V E N L R L L  
 Q S V A Y L A A L L  
 K L P D F L T A K L  
 I F V N I L T H N L  
 T F H D H A L M I I  
 V Y F A E R V T S L  
 A L P V I I F T T F  
 I Y P E L Q I E R F  
 E Y P D R I M N T F  
 T Y N D F I N K E L  
 V F F E V S P V S F  
 I Y P V D L G D K F  
 V L K P G M V V T F  
 R Y F D P A N G K F  
 V Y K D M P E T S F  
 V F F K E L I Q E F  
 A Y V H M V T H F I  
 I A V Q E L L Q L K

Spectrin  $\beta$  chain, brain 1  
 NADH dehydrogenase iron-sulfur prot. 5  
 Hydroxymethylglutaryl-CoA synthase, mitochondrial  
 Chloride intracellular channel prot. 4  
 Splicing factor 3B subunit 3  
 AP-5 complex subunit  $\zeta$ -1  
 Lamin-B1  
 28S ribosomal prot. S5, mitochondrial  
 Muscleblind-like prot. 2  
 28S ribosomal prot. S5, mitochondrial  
 Tyrosine-prot. kinase BAZ1B  
 E3 ubiquitin-prot. ligase UHRF1  
 Nucl. factor erythroid 2-related factor 3  
 $\gamma$ -aminobutyric acid receptor-associated prot.  
 Prot. ELYS  
 Eukar. transl. initiation factor 3 subunit B  
 Mitoch. carrier homolog 2  
 E3 ubiquitin-prot. ligase RNF19B  
 Desmoglein-2  
 Ser/thr-prot. kinase RIO3  
 Transcription factor A, mitochondrial  
 Pumilio homolog 1  
 TEL02-interacting prot. 2  
 Nesprin-2  
 Neurofibromin  
 Apoptosis inhibitor 5  
 Nardilysin  
 Cytochrome c oxidase subunit 2  
 Cysteine-rich prot. 1  
 V-type proton ATPase subunit e 2  
 Amyloid  $\beta$  A4 precursor prot.-bind. family B  
 Tubulin  $\beta$ -4B chain  
 DNA topoisomer. 2- $\beta$   
 2-oxoglutarate/iron-dep. domain-containing prot. 1  
 DNA-dir. RNA polymer. I, II, III subunit RPABC3  
 Elongation factor 1- $\alpha$  1  
 Elongation factor 2  
 Afadin  
 Monocarboxylate transporter 4  
 Bax inhibitor 1  
 Bifunctional glutamate/proline-tRNA ligase

L Y A D V G G K Q F  
 I K Y P E N F F L L  
 R Y F D P A N G K F  
 V Y K D M P E T S F  
 I Y A D N Q V M H F  
 V Y S K D Q L Q T F  
 K F P S L F I N Q F  
 R F P E E L T Q T F  
 R Y V F Q S E N T F  
 P I Y P E V V H M F  
 M L P L L S P V T F  
 E Y V Q D F L N H L  
 Y L P N Q L F R T F  
 L Y N P K I T S E L  
 A F I R V V G S E F  
 L V V Y P W T Q R F  
 I Y Q D S F E Q R F  
 S F I T K I I S K F  
 I Y K P V T D F F L  
 A Y F N E K M S I L  
 K I I E D L G V H F  
 N F G P M K G G N F  
 S Y V S I H S S G F  
 V F S T V V I H F L  
 M Y R P A Y L V T L  
 V Y K D H Q T I T I  
 I Y H N P T A N S F  
 L Y Q D Q I L E K F  
 V Y R K P K W N H L  
 L N E K G Q D T G A  
 S Y K E E I V H Q L  
 I Y P S I N P P T L  
 R Y T V G G L E T F  
 R L P E V E V P Q H L  
 D Y F S E R I K N Q F  
 K Y P K G A G R V A F  
 I Y F P K K E A V T F  
 F Y V P A E P K L A F  
 V Y V I E P H S M E F  
 P Y F P H A D T I I Y  
 D Y V E I N I D H K F

Translocon-associated protein subunit delta  
 Ser/thr-prot. phosphatase PP1- $\beta$  catalytic subunit  
 Elongation factor 2  
 Afadin  
 DNA polymerase  $\epsilon$  catalytic subunit A  
 Beta-centractin  
 Threonylcarbamoyladenos. tRNA methylthiotransf.  
 Elongation factor 1- $\gamma$   
 Suppressor of fused homolog  
 Ser/thr-prot. phosphat. 2A regulatory subunit  
 Cdc42 effector prot. 3  
 Polyadenylate-bind. prot.-interacting prot. 1  
 ATP-dependent RNA helicase DDX1  
 Telomere-associated prot. RIF1  
 26S protease regulatory subunit  
 Hemoglobin subunit  $\beta$   
 Cullin-4B  
 Prot. TANC1  
 Leu-rich PPR motif-containing prot., mitoch.  
 Probable ATP-dependent RNA helicase DDX10  
 Small subunit processome component 20 homolog  
 Heterogeneous nucl. ribonucleoprot. A1-like 2  
 Spliceosome RNA helicase DDX39B  
 3-hydroxy-3-methylglutaryl-coenzyme A reductase  
 COMM domain-containing prot. 3  
 DNA replication licensing factor MCM3  
 Vasodilator-stimulated phosphoprot.  
 Tubulin  $\epsilon$  chain  
 Fatty acid desaturase 2  
 Myoferlin  
 Adenylate kinase isoenzyme 6  
 Cell differentiation prot. RCD1 homolog  
 Tyr-prot. phosphatase non-receptor type 6  
 Nucleobindin-1  
 Prot. FAM111B  
 Cytoplasmic polyadenylation element-bind. prot. 2  
 Phospholipase A-2-activating prot.  
 60S ribosomal prot. L7  
 Nucl. pore membrane glycoprot. 210  
 Transmembrane prot. 135  
 Vigilin



I Y V N P A N T H Q F  
 A Y A A K N A V T Q F  
 I Y S P D H T N N S F  
 V F I H K D K G F G F  
 S K P V F S E S L S D  
 M Y I K Q V I I Q G F  
 V L M T Q Q P R P V L  
 S Y P M V L G A Q H F  
 T F A P S T I I F H L  
 Y Y P T E D V P R K L  
 R Y I S P D Q L A D L  
 S E M E V Q D A E L K  
 M I N T D L S R I L K  
 G I F M K P S E L L K  
 I Y V G D G Y V V H L  
 R Y P T S I A S L A F  
 T F P N I A S A T K F  
 T Y V P V T T F K N L  
 T Y T D V T P R Q F F  
 I Y V D Q N I H E Q L  
 T Y V P V T T F K N L  
 T Y T D V T P R Q F F  
 N L P D E E I F Q Q L  
 N Y S T V P Q K Q T L  
 K Y Q E V T N N L E F  
 I Y S P D H S S N N F  
 I Y G E K F E D E N F  
 I Y P D Q K E N T H F  
 V H A V Q A L W K Q F  
 P F F N P I Q T Q V F  
 R F P P Y H V G Q T F  
 L Y P N I D K D H A F  
 V Y K H I K E A G M F  
 N F F P Y G D A S K F  
 K Y I D K T I R V K F  
 S L P S A S H F S Q L  
 R F V N V V P T F G K  
 D Y K D N F G S S S F  
 V Y R D G T G V V E F  
 I F K P P D P D N T F  
 P Y A P S G E I P K F  
 V F P S M P I K L Q L

DDB1- and CUL4-associated factor 8  
 Putat. cytochr. b-c1 complex subunit  
 Transcription factor 4  
 Non-POU domain-containing octamer-bind. prot.  
 Mitoch. membr. translocase subunit Tim8 A  
 Structural maintenance of chromosomes prot. 3  
 H/ACA ribonucleoprot. complex subunit 3  
 E3 ubiquitin-prot. ligase TRIM21  
 Dolichyl-diphosphooligosaccharide-prot. Glycosyltr.  
 60S ribosomal prot. L6  
 Alpha-enolase  
 Proliferation-associated prot. 2G4  
 60S ribosomal prot. L4  
 Stromal cell-derived factor 2  
 HRAS-like suppressor 2  
 Mitotic checkpoint prot. BUB3  
 Heme oxygenase 1  
 60S ribosomal prot. L31  
 StAR-rel. lipid transfer prot. 7, mitochondrial  
 Ubiquitin conjugation factor E4 A  
 60S ribosomal prot. L31  
 StAR-rel. lipid transfer prot. 7, mitochondrial  
 COMM domain-containing prot. 8  
 Zinc finger CCCH domain-containing prot. 14  
 Caprin-1  
 Transcription factor E2- $\alpha$   
 Peptidyl-prolyl cis-trans isomer. D  
 Chitinase-3-like prot. 2  
 Interleukin-32  
 U5 small nucl. ribonucleoprot. 200 kDa helicase  
 DNA-bind. prot. A  
 Signal transd. and active. of transcription 1- $\alpha/\beta$   
 Choline-phosphate cytidyltransferase A  
 Neuron-specific calcium-bind. prot. hippocalcin  
 U6 snRNA-associated Sm-like prot. LSm7  
 Prot. PRRC2C  
 40S ribosomal prot. S30  
 Cyclin-dependent kinase 13  
 Ser/arg-rich splicing factor 1  
 Modulator of apoptosis 1  
 UDP-glucose 6-dehydrogenase  
 NMDA receptor-regulated prot. 2

D Y I D P A I M K K L  
 S Y F P E I T H I V I  
 K Y M P S V K V S V F  
 G Y A G E L G F R A F  
 F A S E N D L P E W K  
 I Y N S I N G A I T Q F  
 V Y A I R E A A T N N L  
 G F G D S R G G G N F  
 I Y G E K F E D E N F I  
 S L V S K G T L V Q T K  
 A R V I T E E E K N F K  
 G F V K V V K N K A Y F  
 V Y G D V Q R V K I L F  
 I Y I D S N N N P E R F  
 R L P D G T S L T Q T F  
 Y F I D S T N L K T H F  
 P Y A A S P A T A A S F  
 R L A K A D G I V S K N F  
 V Y T P V G K A E Q G K F  
 P Y A N Q P T V R I T E L  
 I L E L A G N A A R D N K  
 M V V E S A Y E V I K L K  
 V F V S E G K I L T T G F  
 E Q I S D I D D A V R K L  
 I Y T G H I Y G E E G S F  
 V L E L A G N A S K D L K  
 Y I K S T M G K P Q R L Y  
 I L E L A G N A A R D N K  
 R Y P F H D S D P S A L F  
 N Y P E Q K V V T V G Q F  
 D Y A S A F Q G H D V G F  
 V G V P R S I A A N M T F  
 A L G D P K A P G L G A F  
 I K P S V E P S A G H D E L  
 Q G S V Q K V Y N G L Q G Y  
 A S I K K G E D F V K T L K  
 T Y F P H F D L S H G S A Q V  
 Y A S G R T T G I V M D S G D  
 I V K T L E D I D L G P T E K  
 I E D L S Q Q A Q L A A A E K  
 L Q A L D F F G N P P V N Y K

Nucl. GTP-bind. prot. 1  
 Tyrosine-prot. kinase JAK1  
 ATP-dependent RNA helicase DDX39A  
 Ubiquitin fusion degradation prot. 1 homolog  
 Ran-specific GTPase-activating prot.  
 Zinc finger prot. RFP  
 Ser/thr-prot. phosphat. 2A regul. A  $\beta$  isof.  
 Heterogeneous nucl. ribonucleoprot. A2/B1  
 Peptidyl-prolyl cis-trans isomer. A  
 Histone H1.5  
 60S ribosomal prot. L13  
 60S ribosomal prot. L5  
 Polypyrimidine tract-bind. prot. 1  
 Clathrin hc 1  
 UBX domain-containing prot. 1  
 Zinc finger prot. 593  
 RNA-bind. prot. 38  
 40S ribosomal prot. S21  
 Puromycin-sensitive aminopeptidase-like prot.  
 DNA-directed RNA polymerase II subunit RPB3  
 Histone H2A type 1  
 L-lactate dehydrogenase B chain  
 Coronin-1A  
 RNA polymer. II transcriptional coactivator p15  
 Disintegrin and metalloproteinase prot. 10  
 Histone H2A.V  
 60S ribosomal prot. L10a  
 Histone H2A type 1-J  
 Tribbles homolog 1  
 Vacuolar prot. sorting-associated prot. 29  
 Oxidoreductase HTATIP2  
 DNA-directed RNA polymerase II subunit RPB1  
 DNA-dependent protein kinase catalytic subunit  
 Stromal cell-derived factor 2-like prot. 1  
 DnaJ homolog subfamily B member 11  
 Malate dehydrogenase, mitochondrial  
 Hemoglobin subunit  $\alpha$   
 Actin, cytoplasmic 1  
 Citrate lyase subunit  $\beta$ -like prot., mitochondrial  
 Nascent polypeptide-associated complex subunit  $\alpha$   
 Gamma-interf.-inducible lysosomal thiol reductase

|                                               |                                                |
|-----------------------------------------------|------------------------------------------------|
| L A G E E L A G E E A P Q E K                 | Hepatoma-derived growth factor-related prot. 2 |
| H G S Y E D A V H S G A L N D                 | T-complex prot. 1 subunit $\alpha$             |
| L E G K V L P G V D A L S N I                 | Phosphoglycerate kinase 1                      |
| A G N L G G G V V T I E R S K                 | 60S ribosomal prot. L22                        |
| S S K Q A K D V S R M R S V L                 | Clathrin light chain A                         |
| V L L P K K T E S H H K A K G                 | Histone H2A type 2-A                           |
| A Q L G G P E A A K S D E T A A               | Heat shock prot. $\beta$ -1                    |
| I Y K G F E S P S D N S S A M L               | Actin-related prot. 2/3 complex subunit 5      |
| L F V G N L P A D I T E D E F K               | Splicing factor, pro- and gln-rich             |
| T S A S F V N K Q P T L Q A A E L             | TATA-bind. prot.-associated factor 172         |
| H A V S E G T K A V T K Y T S A K             | Histone H2B type 1-J                           |
| V G D V G Q T V D D P Y A T F V K             | Cofilin-1                                      |
| V Y I P V G G S Q H G L L G T L F             | Prot.-cys N-palmitoyltransferase HHAT          |
| A S M H P V T A M L V G K D L K V D           | Leukotriene A-4 hydrolase                      |
| M V V N E G S D G G Q S V Y H V H L           | His triad nucleotide-bind. prot. 1             |
| A A N D A G Y F N D E M A P I E V K           | 3-ketoacyl-CoA thiolase, mitochondrial         |
| D G R G A L Q N I I P A S T G A A K           | Glyceraldehyde-3-phosphate dehydrogenase       |
| A S S E G G T A A G A G L D S L H K           | Actin-related prot. 2/3 complex subunit 1B     |
| M A G S S R K E A E S S P F V E R L L         | Endoplasmin                                    |
| A I V E A L N G K E V A A Q V K A P L V L K D | Prot. DJ-1                                     |

**origin: LCL 721.221 cells / High binding peptides (after TFA)**

|          |          |          |          |          |          |          |          |          |           |           |           |           |           |           |           |           |           |                                                       |
|----------|----------|----------|----------|----------|----------|----------|----------|----------|-----------|-----------|-----------|-----------|-----------|-----------|-----------|-----------|-----------|-------------------------------------------------------|
| <b>1</b> | <b>2</b> | <b>3</b> | <b>4</b> | <b>5</b> | <b>6</b> | <b>7</b> | <b>8</b> | <b>9</b> | <b>10</b> | <b>11</b> | <b>12</b> | <b>13</b> | <b>14</b> | <b>15</b> | <b>16</b> | <b>17</b> | <b>18</b> |                                                       |
| P        | V        | T        | T        | F        | K        | N        | L        |          |           |           |           |           |           |           |           |           |           | 60S ribosomal prot. L31                               |
| V        | Y        | I        | K        | H        | P        | V        | S        | L        |           |           |           |           |           |           |           |           |           | 26S proteasome non-ATPase regulatory subunit 8        |
| A        | Y        | V        | H        | M        | V        | T        | H        | F        |           |           |           |           |           |           |           |           |           | Bax inhibitor 1                                       |
| K        | F        | I        | D        | T        | T        | S        | K        | F        |           |           |           |           |           |           |           |           |           | 60S ribosomal prot. L3                                |
| V        | L        | P        | K        | L        | Y        | V        | K        | L        |           |           |           |           |           |           |           |           |           | Putative 40S ribosomal prot. S26-like 1               |
| V        | A        | A        | G        | S        | Y        | Q        | R        | F        |           |           |           |           |           |           |           |           |           | Polyamine-modulated factor 1                          |
| P        | F        | V        | D        | H        | V        | F        | T        | F        |           |           |           |           |           |           |           |           |           | Ribosome biogenesis prot. BRX1 homolog                |
| T        | Y        | G        | E        | I        | F        | E        | K        | F        |           |           |           |           |           |           |           |           |           | NADH dehydrogenase [ubiquinone] 1 subunit C2          |
| R        | Y        | P        | T        | S        | I        | A        | S        | L        |           |           |           |           |           |           |           |           |           | Mitotic checkpoint prot. BUB3                         |
| V        | Y        | G        | P        | L        | P        | Q        | S        | F        |           |           |           |           |           |           |           |           |           | Cytochrome c oxidase subunit 4 isof. 1, mitochondrial |
| S        | Y        | M        | G        | H        | F        | D        | L        | L        |           |           |           |           |           |           |           |           |           | Splicing factor 3B subunit 5                          |
| N        | Y        | G        | R        | V        | F        | S        | E        | W        |           |           |           |           |           |           |           |           |           | Sorting nexin-4                                       |
| I        | F        | T        | P        | I        | V        | E        | H        | L        |           |           |           |           |           |           |           |           |           | RNA-bind. prot. PNO1                                  |
| S        | F        | S        | T        | V        | H        | E        | K        | F        |           |           |           |           |           |           |           |           |           | WD repeat-containing prot. 36                         |
| D        | Y        | A        | E        | T        | V        | H        | Q        | L        |           |           |           |           |           |           |           |           |           | Spectrin $\beta$ chain, brain 1                       |
| N        | Y        | F        | L        | D        | P        | V        | T        | I        |           |           |           |           |           |           |           |           |           | Tripartite motif-containing prot.                     |
| V        | L        | P        | A        | F        | T        | S        | N        | L        |           |           |           |           |           |           |           |           |           | Poly [ADP-ribose] polymerase 4                        |

|   |   |   |   |   |   |   |   |   |                                                                 |                                           |
|---|---|---|---|---|---|---|---|---|-----------------------------------------------------------------|-------------------------------------------|
| I | Y | K | Q | D | L | P | S | L | Heat shock prot. 105 kDa                                        |                                           |
| S | Q | M | K | S | Y | Q | S | F | General transcription factor 3C polypeptide 1                   |                                           |
| I | Y | T | S | S | V | N | R | L | Coatomer subunit $\beta$                                        |                                           |
| P | Y | A | G | D | V | S | M | F | Plasminogen activator inhibitor 2                               |                                           |
| D | Y | G | I | V | A | D | L | F | Electron transfer flavoprotein subunit $\alpha$ , mitochondrial |                                           |
| V | Y | I | D | K | V | R | S | L | Lamin-B1                                                        |                                           |
| K | Y | A | H | M | I | N | G | F | Adenylosuccinate synthetase isozyme 2                           |                                           |
| D | Y | A | E | V | S | N | T | F | DNA-directed RNA polymerase III subunit RPC3                    |                                           |
| K | F | T | P | V | A | S | K | F | Zyxin                                                           |                                           |
| L | Y | T | E | K | F | E | E | F | Alpha-taxilin                                                   |                                           |
| P | Q | P | D | V | F | P | L | F | Prot. AATF                                                      |                                           |
| V | Y | V | V | G | T | A | H | F | TraB domain-containing prot.                                    |                                           |
| Y | Y | F | P | V | K | N | V | I | Splicing factor 3B subunit 3                                    |                                           |
| T | Y | Q | D | I | Q | N | T | I | DNA-directed RNA polymerase II subunit RPB1                     |                                           |
| I | Y | I | K | Q | I | K | T | F | Retinoblastoma-like prot. 2                                     |                                           |
| V | Y | I | K | H | P | V | S | L | 26S proteasome non-ATPase regulatory subunit 8                  |                                           |
| D | Y | M | K | T | T | S | N | F | Nucl. export mediator factor NEMF                               |                                           |
| D | Y | V | E | G | L | R | V | F | Myosin light polypeptide 6                                      |                                           |
| K | Y | P | E | N | F | F | L | L | Ser/thr-pro. phosphatase PP1- $\beta$ catalytic subunit         |                                           |
| S | Y | I | E | H | I | F | E | I | Astrocytic phosphoprot. PEA-15                                  |                                           |
| N | Y | V | Q | A | V | E | E | F | Nucl. autoantigenic sperm prot.                                 |                                           |
| H | Y | V | E | K | P | S | T | F | Mannose-1-phosphate guanyltransferase $\alpha$                  |                                           |
| V | F | P | A | I | A | Q | E | I | Cell division control prot. 6 homolog                           |                                           |
| A | Y | V | E | L | V | H | H | I | CDK5 regulatory subunit-associated prot. 1                      |                                           |
| K | Y | T | P | P | P | H | H | I | NADH dehydrogenase [ubiquinone] iron-sulfur prot. 5             |                                           |
| I | Y | G | E | K | T | Y | A | F | Serpin B10                                                      |                                           |
| K | Y | P | D | R | V | P | V | I | $\gamma$ -aminobutyric acid receptor-associated prot.           |                                           |
| P | Y | V | N | N | V | P | H | L | Methionine--tRNA ligase, cytoplasmic                            |                                           |
| S | Y | A | Q | Y | V | H | N | L | 39S ribosomal prot. L48                                         |                                           |
| E | Y | S | K | Q | M | Q | R | F | Histone deacetylase 1                                           |                                           |
| A | Y | S | D | V | A | K | R | L | Chloride intracellular channel prot. 4                          |                                           |
| E | Y | V | V | V | P | S | T | F | Calpain-1 catalytic subunit                                     |                                           |
| K | Y | V | S | I | N | S | T | L | Prot. FAM208B                                                   |                                           |
| I | Y | K | P | V | T | D | F | F | Leu-rich PPR motif-containing prot., mitochondrial              |                                           |
| D | Y | S | S | I | L | Q | K | F | Formin-bind. prot. 1                                            |                                           |
| E | Y | Y | D | K | H | F | T | E | F                                                               | V-type proton ATPase catalytic subunit A  |
| I | Y | S | T | V | D | D | D | H | F                                                               | Replication prot. A 32 kDa subunit        |
| I | Y | Y | T | G | K | Y | Q | S | L                                                               | Probable E3 ubiquitin-prot. ligase MYCBP2 |
| V | Y | A | H | I | Y | H | Q | H | F                                                               | MOB kinase activator 1A                   |
| R | Y | F | D | P | A | N | G | K | F                                                               | Elongation factor 2                       |
| A | Y | F | P | E | L | I | A | N | F                                                               | Solute carrier family 25 member 46        |

|                       |                                                                  |
|-----------------------|------------------------------------------------------------------|
| A F I R V V G S E F   | 26S protease regulatory subunit 6B                               |
| Y Y S H L E G A R F   | Nucl. pre-ribosomal-associated prot. 1                           |
| S F A K I Y A D T F   | 116 kDa U5 small nucl. ribonucleoprot. component                 |
| T Y T D V T P R Q F   | StAR-related lipid transfer prot. 7, mitochondrial               |
| L Y A D V G G K Q F   | Translocon-associated prot. subunit $\delta$                     |
| R Y P P K S G N Y F   | E3 ubiquitin-prot. ligase MGRN1                                  |
| I Y P V D L G D K F   | DNA-directed RNA polymerases I, II, and III subunit RPABC3       |
| E Y P D R I M N T F   | Tubulin beta-2A chain                                            |
| I Y I S T L K T E F   | Activator of 90 kDa heat shock prot. ATPase homolog 1            |
| N Y V N K I K N R F   | Paired amphipathic helix prot. Sin3a                             |
| E Y Y D K A F D R I   | Eukaryotic translation initiation factor 3 subunit D             |
| K Y V L G Y K Q T L   | 60S ribosomal prot. L30                                          |
| P Y T D V N I V T I   | Isocitrate dehydrogenase [NAD] subunit $\alpha$ , mitochondrial  |
| R F P E E L T Q T F   | Elongation factor 1- $\gamma$                                    |
| A Y V K G G L S T F   | Exocyst complex component 2                                      |
| I Y K D L P F E T L   | 39S ribosomal prot. L39, mitochondrial                           |
| R Y F D G N L E K L   | E3 ubiquitin-prot. ligase                                        |
| P Y A K P I P A Q F   | pre-mRNA 3' end processing prot. WDR33                           |
| H Y Y R G N Y M T F   | ATP-bind. cassette sub-family F member 1                         |
| E Y I A A F L S H F   | BRCA1-A complex subunit BRE                                      |
| R Y Y P A K I E A I   | PHD finger prot. 20-like prot. 1                                 |
| I Y P E L Q I E R F   | Amyloid $\beta$ A4 precursor prot.-bind. family B member 1       |
| V F V G N I D D H F   | Digestive organ expansion factor                                 |
| V Y V P K E E Q L F   | Torsin-3a                                                        |
| Q F I E P F E E K F   | CCR4-NOT transcription complex subunit 10                        |
| K Y Y E D N K Q F F   | NADH dehydrogenase [ubiquinone] 1 $\alpha$ subcomplex subunit 12 |
| V F P L L V A E T F   | Deoxyhypusine synthase                                           |
| Y Y M K D L P T S F   | Phosphatidylinositol 4-kinase $\alpha$                           |
| F Y Y D G K V M K L   | DNA topoisomer. 1                                                |
| Q Y V E D G I G H E F | 80 kDa MCM3-associated prot.                                     |
| E Y A K P T R L N V F | Heterogeneous nuclear ribonucleoprot. L                          |
| E Y F R V P D S A T F | Vacuolar prot. sorting-associated prot.                          |
| S Y A K L L G H Q N L | Hyaluronan mediated motility receptor                            |
| D Y F S E R I K N Q F | Prot. FAM111B                                                    |
| N Y V N S I I V H K F | Prot. CLEC16A                                                    |
| R Y P D N L K H L Y L | Thyroid transcription factor 1-associated prot. 26               |
| K Y I T Q G Q L L Q F | Elongation of very long chain fatty acids prot. 5                |
| R V A P V P L Y N S F | Kynureninase                                                     |
| V F I N K G K G F G F | Splicing factor, pro- and gln-rich                               |
| I F K P P D P D N T F | Modulator of apoptosis 1                                         |
| R N P P G F A F V E F | Ser/arg-rich splicing factor 3                                   |

|                           |                                                                    |
|---------------------------|--------------------------------------------------------------------|
| T F P N I A S A T K F     | Heme oxygenase 1                                                   |
| M Y I K Q V I I Q G F     | Structural maintenance of chromosomes prot. 3                      |
| K Y P D E N G F D A F     | Nardilysin                                                         |
| V Y V I E P H S M E F     | Nucl. pore membrane glycoprot. 210                                 |
| I Y S P D H T N N S F     | Transcription factor 4                                             |
| K Y I D K T I R V K F     | U6 snRNA-associated Sm-like prot. LSM7                             |
| E Y V E A V S F Q H F     | Translin-associated prot. X                                        |
| R F P P Y H V G Q T F     | DNA-bind. prot. A                                                  |
| G Y A D K N L I A K W     | Prot. BUD31 homolog                                                |
| V H A V Q A L W K Q F     | Interleukin-32                                                     |
| S Y P M V L G A Q H F     | E3 ubiquitin-prot. ligase TRIM21                                   |
| L Y P N I D K D H A F     | Signal transducer and activator of transcription 1- $\alpha/\beta$ |
| R Y I S P D Q L A D L     | Alpha-enolase                                                      |
| T F A N I K L F N K F     | Iron-responsive element-bind. prot. 2                              |
| N L P D E E I F Q Q L     | COMM domain-containing prot. 8                                     |
| V F V P R D V P E S F     | WD repeat-containing prot. 75                                      |
| I Y V G D G Y V V H L     | HRAS-like suppressor 2                                             |
| H Y V D L K D R P F F     | Nucleoside diphosphate kinase A                                    |
| V Y V D L G G S H V F     | Ribosome biogenesis prot. BMS1 homolog                             |
| I Y V N P A N T H Q F     | DDB1- and CUL4-associated factor 8                                 |
| Q Y Q D T K G F S T W     | Moesin                                                             |
| R Y A P G D A V E K W     | N-acetyltransferase 10                                             |
| T Y A A L N S K A T F     | Ras GTPase-activating-like prot. IQGAP1                            |
| I Y K D D I S N S S F     | Ras-related GTP-bind. prot. C                                      |
| L Y Y D E K K M A N F     | Hypoxia-inducible factor 1- $\alpha$ inhibitor                     |
| R W P K K S A E F L L     | 60S ribosomal prot. L17                                            |
| R Y V E Q K A G I T F     | ATP-dependent RNA helicase DDX50                                   |
| K Y M P N V K V A V F     | Spliceosome RNA helicase                                           |
| W Y V H P Q V L Q S F     | Chromatin assembly factor 1 subunit A                              |
| V F I H K D K G F G F     | Non-POU domain-containing octamer-bind. prot.                      |
| T F A P S T I I F H L     | Dolichyl-diphosphooligosaccharide-prot. glycosyltransferase        |
| K Y M P S V K V S V F     | ATP-dependent RNA helicase DDX39A                                  |
| I Y I D S N N N P E R F   | Clathrin hc 1                                                      |
| S L V S K G T L V Q T K   | Histone H1.5                                                       |
| Y F I D S T N L K T H F   | Zinc finger prot. 593                                              |
| A Y V S D L G K V F S F   | E3 ISG15-prot. ligase HERC5                                        |
| A L S T G E K G F G Y K   | Peptidyl-prolyl cis-trans isomer. A                                |
| I Y N S I N G A I T Q F   | Zinc finger prot. RFP                                              |
| A Y A D T K L A N V L F   | Dehydrogenase/reductase SDR family member 13                       |
| D Y A S A F Q G H D V G F | Oxidoreductase HTATIP2                                             |
| I L E L A G N A A R D N K | Core histone macro-H2A.1                                           |
| V L E L A G N A S K D L K | Histone H2A.Z                                                      |



S K P V F S E S L S D  
 T Y V P V T T F K N L  
 R Y I S P D Q L A D L  
 Y Y P T E D V P R K L  
 V F I H K D K G F G F  
 S N F G P M K G G N F  
 L Y P N I D K D H A F  
 V L M T Q Q P R P V L  
 V H A V Q A L W K Q F  
 F Y V P A E P K L A F  
 R L P K S P P Y T A F  
 D K F K Y D D A E R R F  
 Y F I D S T N L K T H F  
 R L P D G T S L T Q T F  
 S L V S K G T L V Q T K  
 G F G D S R G G G N F  
 A R V I T E E E K N F K  
 N A V K Y L Q S L E R S  
 A H A E D S V M D H H F  
 K L P K Q P V I V K A K F  
 I Y T G H I Y G E E G S F  
 I L E L A G N A A R D N K  
 T Y F P H F D L S H G S A  
 P Y Q Y P A L T P E Q K K  
 I Y I D S N N N P E R F L  
 V F V S E G K I L T T G F  
 G F V K V V K N K A Y F K  
 V L E L A G N A S K D L K  
 V Y F K P S L T P S G E F  
 F A D K V P K T A E N F R  
 V L K Q V H P D T G I S S K  
 Q G S V Q K V Y N G L Q G Y  
 K E E I I K T L S K E E E T  
 M V A K E A R N V T M E T E  
 D Y S G Y Q R D G Y Q Q N F  
 F E E E A K N P G L E T H R  
 V N V T F E G S N G T P L I  
 P D R I M N T F S V V P S P K  
 S D G V I K V F N D M K V R K  
 P G V T V K D V N Q Q E F V R  
 Q A Q N T V T L A T S I K E K

Mitoch. membr. translocase subunit Tim8 A  
 60S ribosomal prot. L31  
 Alpha-enolase  
 60S ribosomal prot. L6  
 Non-POU domain-cont. octamer-bind. prot.  
 Heterogen. nucl. ribonucleoprot. A1-like 2  
 Signal transd. active. of transcr. 1- $\alpha/\beta$   
 H/ACA ribonucleoprot. complex subunit 3  
 Interleukin-32  
 60S ribosomal prot. L7  
 Eukar. translation initiation factor 4B  
 Elongation factor 1- $\delta$   
 Zinc finger prot. 593  
 UBX domain-containing prot. 1  
 Histone H1.2  
 Heterogeneous nuclear ribonucleoprot. A2/B1  
 60S ribosomal prot. L13  
 C-C motif chemokine 17  
 Plasminogen activ. inhib. 1 RNA-bind. prot.  
 60S ribosomal prot. L27a  
 Disintegrin, metalloprot. domain prot. 10  
 Histone H2A type 1-B/E  
 Hemoglobin subunit  $\alpha$   
 Fructose-bisphosphate aldolase A  
 Clathrin hc 1  
 Coronin-1A  
 60S ribosomal prot. L5  
 Histone H2A.V  
 Nuclear pore complex prot. Nup153  
 Peptidyl-prolyl cis-trans isomer. A  
 Histone H2B type F-S  
 DnaJ homolog subfamily B member 11  
 60S ribosomal prot. L19  
 Signal recognition particle 9 kDa prot.  
 Caprin-1  
 Aprataxin  
 Capsid polyprot.  
 Tubulin beta-3 chain  
 Cofilin-1  
 40S ribosomal prot. S19  
 Citrate lyase subunit  $\beta$ -like prot.



H G S Y E D A V H S G A L N D  
 L A G E E L A G E E A P Q E K  
 R G G C G V V G G G S C S S V  
 A S N E D V T K A V D I T T P K  
 S Y V G D E A Q S K R G I L T L  
 L F V G N L P A D I T E D E F K  
 S A S E H S S S A E S E R S Y K  
 A W V E S R E K Q A K G D T E F  
 S M G S Q E D D S G N K P S S Y S  
 H A V S E G T K A V T K Y T S S K  
 P P A E N S S A P E A E Q G G A E  
 A Y V R L A P D Y D A L D V A N K  
 D G R G A L Q N I I P A S T G A A K  
 A S S E G G T A A G A G L D S L H K  
 A Y V D L E K D F A A E V V H P G D L K  
 K A S K T A E N A T S G E T L E E N E A G D

T-complex prot. 1 subunit  $\alpha$   
 Hepatoma-der. growth factor-related prot. 2  
 Zinc finger prot. 609  
 PC4 and SFRS1-interacting prot.  
 Actin, cytoplasmic 1  
 Splicing factor, pro- and gln-rich  
 Pre-mRNA-processing factor 40 homolog A  
 Calcyclin-bind. prot.  
 COP9 signalosome complex subunit 3  
 Histone H2B type 1-C  
 Nuclease-sensitive element-bind. prot. 1  
 60S ribosomal prot. L23a  
 Glyceraldehyde-3-phosphate dehydrogenase  
 Actin-related prot. 2/3 complex subunit 1B  
 Tyrosine--tRNA ligase, cytoplasmic  
 Proliferation-associated prot. 2G4

**origin: LCL 721.220 cells / High binding peptides (after TFA)**

**1 2 3 4 5 6 7 8 9 10 11 12 13 14 15 16 17 18 19 20**  
 H L T D A Y F K  
 K Y G P V F S F  
 L Y W S H P R K F  
 V Y A Q V A R L F  
 T F S D V E A H F  
 V A A G S Y Q R F  
 L Y S E V D V H F  
 I F A S F N D T F  
 H W V E F Q N K F  
 Y Y T R L G N D F  
 D Y S S I L Q K F  
 V Y V V G T A H F  
 R F I G A T A N F  
 E E T I E K M Q E  
 I F T N T V A R F  
 T Y G E I F E K F  
 I Y K Q D L P S L  
 K F I D T T S K F  
 V F P E K G Y S F  
 P F V D H V F T F  
 D Y A E T V H Q L

60S ribosomal prot. L6  
 Lanosterol 14-alpha demethylase  
 40S ribosomal prot. S29  
 Paired amphipathic helix prot. Sin3a  
 Zinc finger prot. 280C  
 Polyamine-modulated factor 1  
 Pogo transposable element with ZNF domain  
 40S ribosomal prot. S14  
 V-type proton ATPase 116 kDa subunit a isof. 2  
 40S ribosomal prot. S17-like  
 Formin-bind. prot. 1  
 TraB domain-containing prot.  
 Ribonuclease H2 subunit C  
 60S ribosomal prot. L26  
 A-kinase anchor prot. 11  
 NADH dehydrogenase [ubiquinone] 1 subunit C2  
 Heat shock prot. 105 kDa  
 60S ribosomal prot. L3  
 Nucleolysin TIAR  
 Ribosome biogenesis prot. BRX1 homolog  
 Spectrin  $\beta$  chain, brain 1

V Y G P L P Q S F  
 R Y P T S I A S L  
 I F T D L S S R F  
 I Y K A P S E N W  
 T F A G I E N K F  
 D Y G I V A D L F  
 R W A P N E N K F  
 E E L I E K M Q E  
 I Y Q K P F Q T L  
 A Y V H M V T H F  
 K Y P A S T V Q I  
 I Y G Y V A E Q F  
 T Y P D V N N S I  
 V F P A I A Q E I  
 V F P D K G Y S F  
 S Q M K S Y Q S F  
 P Y N A P T V K F  
 K Y P D I I S R I  
 I L P K E L Q T W  
 I F S K I V S L F  
 V Y I K H P V S L  
 E F P S I K T E F  
 Y Y N K V S T V F  
 I D A G Y R H I D  
 I Y A P K L Q E F  
 N Y Y E V H K E L F  
 I Y P E L Q I E R F  
 A Y V S R L P A A F  
 H Y P Q F S G Q S F  
 T Q P G T G W V Q F  
 D Y A A I R D N Y F  
 R F P E E L T Q T F  
 I Y S T V D D D H F  
 T Y F N G D L K N F  
 V L K P G M V V T F  
 Y L P N Q L F R T F  
 P Y A K P I P A Q F  
 I Y K D L P F E T L  
 A F I R V V G S E F  
 Y Y P A Q G V Q Q F  
 V W A A V P G K T F

Cytochrome c oxidase subunit 4 isof. 1, mitochondrial  
 Mitotic checkpoint prot. BUB3  
 X-ray repair cross-complementing prot. 5  
 DNA (cytosine-5)-methyltransferase 1  
 Calcium-bind. mitochondrial carrier prot. Aralar2  
 Electron transfer flavoprotein subunit  $\alpha$ , mitochondrial  
 Actin-related prot. 2/3 complex subunit 1B  
 60S ribosomal prot. L26-like 1  
 Atlastin-2  
 Bax inhibitor 1  
 Nucl. prot. 56  
 Signal peptidase complex subunit 1  
 Vacuolar prot. sorting-associated prot. 26<sup>a</sup>  
 Cell division control prot. 6 homolog  
 Nucleolysin TIA-1 isof. p40  
 General transcription factor 3C polypeptide 1  
 Ubiquitin-conjugating enzyme E2 C  
 DNA ligase 1  
 Zinc finger prot. 24  
 Putative eukar. transl. initiation factor 2 subunit 3  
 26S proteasome non-ATPase regulatory subunit 8  
 Centromere-associated prot. E  
 Eukaryotic translation initiation factor 3 subunit A  
 Aldo-keto reductase family 1 member  
 G1/S-specific cyclin-E2  
 Prot. regulator of cytokinesis 1  
 Amyloid  $\beta$  A4 precursor prot.-bind. family B member 1  
 Acyl carrier prot., mitochondrial  
 Arylsulfatase A  
 Adaptin ear-bind. coat-associated prot. 2  
 Ras-related prot. Ral-A  
 Elongation factor 1- $\gamma$   
 Replication prot. A 32 kDa subunit  
 MAP7 domain-containing prot. 3  
 Elongation factor 1- $\alpha$  1  
 ATP-dependent RNA helicase DDX1  
 pre-mRNA 3' end processing prot. WDR33  
 39S ribosomal prot. L39, mitochondrial  
 26S protease regulatory subunit 6B  
 Eukaryotic translation initiation factor 4  $\gamma$  1  
 Profilin-1

S F A K I Y A D T F  
 I Y P V D L G D K F  
 L Y A D V G G K Q F  
 E Y P D R I M N T F  
 I W I L I D K T S F  
 P Y T D V N I V T I  
 Y Y F E G I K Q T F  
 M Y K T T P D V I F  
 T Y T D V T P R Q F  
 H F F Q P T N Q Q F  
 V Y K E N L V D G F  
 I F T D I G K V D F  
 R Y Y K N I G L G F  
 T L P T F Q S P E F  
 V L P E I D P V L F  
 R F P Q L D S T S F  
 S Y V K L P P E K F  
 V F V G N I D D H F  
 N Y G P M K G G S F  
 I Y F P K K E A V T F  
 S L P P G L A V K E L  
 S F I P S S V P A T F  
 N F F P Y G D A S K F  
 S K P V F S E S L S D  
 T F P N I A S A T K F  
 A Y A L G K D F V T L  
 L Y P N I D K D H A F  
 V W V E E S D K R S F  
 A L P A N A I L N Q F  
 I Y S P D H T N N S F  
 V L P G V D A L S N I  
 T Y A A L N S K A T F  
 E I T A L A P S T M K  
 V L M T Q Q P R P V L  
 R Y I S P D Q L A D L  
 T Y V P V T T F K N L  
 V Y V D L G G S H V F  
 D Y V E I N I D H K F  
 S Y P M V L G A Q H F  
 V F V P R D V P E S F  
 R F P P Y H V G Q T F

116 kDa U5 small nuclear ribonucleoprot. component  
 DNA-dir. RNA polymerases I, II, and III subunit RPABC3  
 Translocon-associated prot. subunit  $\delta$   
 Tubulin  $\beta$ -2A chain  
 Leukocyte antigen CD37  
 Isocitrate dehydrogenase [NAD] subunit  $\alpha$ , mitochondrial  
 Activator of 90 kDa heat shock prot. ATPase homolog 1  
 40S ribosomal prot. S24  
 StAR-related lipid transfer prot. 7, mitochondrial  
 THO complex subunit 1  
 Afadin  
 Nucl. pore complex prot. Nup160  
 40S ribosomal prot. S11  
 Sorting nexin-5  
 N-acetyl-D-glucosamine kinase  
 Fatty acid synthase  
 Vacuolar prot. sorting-associated prot. 33A  
 Digestive organ expansion factor homolog  
 Heterogeneous nuclear ribonucleoprot. A3  
 Phospholipase A-2-activating prot.  
 60S ribosomal prot. L38  
 AP-2 complex subunit  $\beta$   
 Neuron-specific calcium-bind. prot. hippocalcin  
 Mitoch. import inner membr. translocase subunit Tim8 A  
 Heme oxygenase 1  
 Sorting nexin-20  
 Signal transducer and activator of transcription 1- $\alpha/\beta$   
 ATP-dependent RNA helicase DDX3X  
 Polyadenylate-binding prot. 4  
 Transcription factor 4  
 Phosphoglycerate kinase 1  
 Ras GTPase-activating-like prot. IQGAP1  
 Actin, cytoplasmic 1  
 H/ACA ribonucleoprot. complex subunit 3  
 Alpha-enolase  
 60S ribosomal prot. L31  
 Ribosome biogenesis prot. BMS1 homolog  
 Vigilin  
 E3 ubiquitin-prot. ligase TRIM21  
 WD repeat-containing prot. 75  
 DNA-binding prot. A

V Y S Q I P A A V K L  
 W Y V H P Q V L Q S F  
 F Y V P A E P K L A F  
 V F I N K G K G F G F  
 R N P P G F A F V E F  
 E P I Y P E V V H M F  
 I Y V N P A N T H Q F  
 V W I K P G A E Q S F  
 D Y F S E R I K N Q F  
 Y W V G E D S T Y K F  
 V F I H K D K G F G F  
 V F I E G A D A E T F  
 K Y P E A P P F V R F  
 A A V V V S K S G S L K  
 R L P D G T S L T Q T F  
 I Y I D S N N N P E R F  
 V F I T K P P D G S A F  
 I L E L A G N A A R D N K  
 F A D K V P K T A E N F R  
 V Y F K P S L T P S G E F  
 Q G S V Q K V Y N G L Q G Y  
 S A D T L W G I Q K E L Q F  
 Q A Q N T V T L A T S I K E K  
 H A V S E G T K A V T K Y T S S  
 S A S S G A E G D V S S E R E P  
 A S N E D V T K A V D I T T P K  
 H A V S E G T K A V T K Y T S A K  
 D G R G A L Q N I I P A S T G A A K  
 T Y F P H F D L S H G S A Q V K G H G  
 S A A Q A A A Q T N S N A A G K Q L R  
 S L V S K G T L V Q T K G T G A S G S F

E3 ubiquitin-prot. ligase UBR5  
 Chromatin assembly factor 1 subunit A  
 60S ribosomal prot. L7  
 Splicing factor, pro- and gln-rich  
 Ser/arg-rich splicing factor 3  
 Ser/thr-prot. phosph. 2A 56 kDa reg. subunit  $\gamma$  isof.  
 DDB1- and CUL4-associated factor 8  
 60S ribosome subunit biogenesis prot. NIP7 homolog  
 Prot. FAM111B  
 60S ribosomal prot. L15  
 Non-POU domain-containing octamer-bind. prot.  
 Bifunctional glutamate/proline-tRNA ligase  
 Ubiquitin-conjugating enzyme E2 variant 1  
 Nucl. and coiled-body phosphoprot. 1  
 UBX domain-containing prot. 1  
 Clathrin hc 1  
 Solute carrier family 15 member 4  
 Histone H2A type 2-A  
 Peptidyl-prolyl cis-trans isomer. A  
 Nucl. pore complex prot. Nup153  
 DnaJ homolog subfamily B member 11  
 L-lactate dehydrogenase A chain  
 Citrate lyase subunit  $\beta$ -like prot., mitochondrial  
 Histone H2B type 1-A  
 D-tyrosyl-tRNA(Tyr) deacylase 1  
 PC4 and SFRS1-interacting prot.  
 Histone H2B type 1-K  
 Glyceraldehyde-3-phosphate dehydrogenase  
 Hemoglobin subunit  $\alpha$   
 Plasminogen activator inhibitor 1 RNA-bind. prot.  
 Histone H1.2

### Supplementary Table 3:

#### HLA-B\*24:13 derived self peptides

origin: LCL 721.221 cells / Low binding peptides (before TFA)

#### Peptide position

1 2 3 4 5 6 7 8 9 10 11 12 13 14 15 16

#### Ligands

V T E S P A K F  
P L L L S L L I  
V N S A A H L F  
V F H P S Q D L  
P Y V N N V P H L  
S F S T V H E K F  
F Y P P K V E L F  
I Y A P P L P S L  
L Y V D F P Q H L  
Q F I G Y P I T L  
K Y V K G L I S I  
T Y Q E V A Q K F  
K F I D T T S K F  
P Y N H Q H E Y F  
A Y V H M V T H F  
P F L D I Q K R F  
N Y V D V D P T F  
K Y I N T D A K F  
D Y V E G L R V F  
K Y I S K P E N L  
E Y L T K V D K L  
V Y V Q H P I T F  
V Y V E R A E V L  
N Y I G L I N R I  
P F V D H V F T F  
V Y E N V S H F L  
P Y L F H V V T F  
L Y P L T N Y T F  
S Y Q K V I E L F  
K Y I A T D F T L  
V F I D K Q T N L

#### Source

Ras association domain-containing prot. 3  
Protocadherin  $\alpha$ -9  
Acyl-CoA desaturase  
Pre-mRNA-processing factor 19  
Methionine--tRNA ligase, cytoplasmic  
WD repeat-containing prot. 36  
Multifunctional prot. ADE2  
A-kinase anchor prot. 1, mitochondrial  
Signal transducer and activator of transcription 6  
Heat shock prot. HSP 90- $\alpha$   
WD repeat-containing prot. 35  
Adenosine deaminase CECR1  
60S ribosomal prot. L3-like  
Fatty acid desaturase 2  
Bax inhibitor 1  
NADH dehydrogenase [ubiquinone] iron-sulfur prot. 5  
Pecanex-like prot. 1  
Short transient receptor potential channel 4-associated prot.  
Myosin light polypeptide 6  
Calcium-binding prot. 39  
Clathrin hc 1  
Lipopolysaccharide-induced tumor necrosis  $\alpha$  factor  
BRCA1-associated prot.  
Interferon-induced, double-stranded RNA-activated prot. kinase  
Ribosome biogenesis prot. BRX1 homolog  
Mitochondrial folate transporter/carrier  
Neurofibromin  
Cleavage and polyadenylation specificity factor subunit 5  
Lymphokine-activated killer T-cell-originated prot. kinase  
Nardilysin  
CUGBP Elav-like family member 2

|                   |                                                                       |
|-------------------|-----------------------------------------------------------------------|
| T F S D V E A H F | Zinc finger prot. 280C                                                |
| I F I D E I D S F | ATPase family AAA domain-containing prot. 1                           |
| Y Y E E Q H P E L | Interleukin-32                                                        |
| N Y L S H H L T I | Polyadenylate-bind. prot.-interacting prot. 1                         |
| T Y G E I F E K F | NADH dehydrogenase [ubiquinone] 1 subunit C2                          |
| I F S N V R I N L | Caveolin-1                                                            |
| K Y F A Q A L K L | Tetratricopeptide repeat prot. 35                                     |
| I F H E V P L K F | NMDA receptor-regulated prot. 2                                       |
| V Y L D K F I R L | Guanine nucleotide-bind. prot.-like 3-like prot.                      |
| I Y V H D L L T F | Vam6/Vps39-like prot.                                                 |
| K Y I D Q K F V L | Ser/thr-prot. phosphatase 2A 56 kDa regulatory subunit $\delta$ isof. |
| A Y I T Q K V E F | DEP domain-containing prot. 5                                         |
| E Q I K E Y H H L | E3 ubiquitin-prot. ligase RNF213                                      |
| N F T N V A A T F | ATP-citrate synthase                                                  |
| V Y V V G T A H F | TraB domain-containing prot.                                          |
| T Y L K A V K L F | Iron-responsive element-bind. prot. 2                                 |
| R Y V D K V S N L | Probable $\alpha$ -ketoglutarate-dependent dioxygenase                |
| V V L D D K D Y F | 10 kDa heat shock prot., mitochondrial                                |
| S Y I A L P L T L | Nodal modulator 1                                                     |
| N Y A R G H Y T I | Tubulin $\alpha$ -1A chain                                            |
| K Y I D K T I R V | U6 snRNA-associated Sm-like prot. LSm7                                |
| V Y E R E L Q T F | Methyltransferase-like prot. 10                                       |
| V F P E K G Y S F | Nucleolysin TIAR                                                      |
| V Y I H H F D R I | MOB kinase activator 3a                                               |
| I Y T S S V N R L | Coatomer subunit $\beta$                                              |
| V Y L P N I N K I | Rho-related BTB domain-containing prot. 1                             |
| K L P S N L P Q L | Prot. SDA1 homolog                                                    |
| I Y I D R G V V F | Tuftelin-interacting prot. 11                                         |
| E Y I A V V K K L | Acyl-CoA-binding domain-containing prot. 6                            |
| N Y G V L H V T F | NACHT, LRR and PYD domains-containing prot. 11                        |
| Y Y I F I P S K F | Probable ATP-dependent RNA helicase DDX47                             |
| N Y I H V G A Q L | Unconventional myosin-Id                                              |
| T Y L E K A I K I | Ubiquitin carboxyl-terminal hydrolase 7                               |
| V Y G P L P Q S F | Cytochrome c oxidase subunit 4 isof. 1, mitochondrial                 |
| A Y L E A H E T F | Nuclear pore complex prot. Nup107                                     |
| K Y L S G I A H F | Mitochondrial-processing peptidase subunit $\alpha$                   |
| V Y A Q V A R L F | Paired amphipathic helix prot. Sin3a                                  |
| D Y H T K L F L I | Mediator of RNA polymer. II transcription subunit 16                  |
| V Y V K H S I S F | AP-3 complex subunit $\mu$ -1                                         |
| K Y I H S A N V L | Mitogen-activated prot. kinase 1                                      |
| K Y I G E N L Q L | 60S ribosome subunit biogenesis prot. NIP7 homolog                    |

|                     |                                                                       |
|---------------------|-----------------------------------------------------------------------|
| K Y P D R V P V I   | Gamma-aminobutyric acid receptor-associated prot.                     |
| D V A N K I G I I   | 60S ribosomal prot. L23a                                              |
| S Y I A H L R Q L   | Musculin                                                              |
| S Y I S R T N Q L   | Prot. ELYS                                                            |
| N Y I K D L N I L   | CTD small phosphatase-like prot. 2                                    |
| G Y I E R P Q L I   | Poly(A) RNA polymer. GLD2                                             |
| V F V G K G I T F   | Cytosol aminopeptidase                                                |
| D I D K G H V K F   | ATP-dependent RNA helicase DDX1                                       |
| R Y I D R I H I F   | Pre-mRNA-processing-splicing factor 8                                 |
| E Y V E K F Y R I   | DNA repair prot. RAD50                                                |
| I Y N Y P E Q L F   | T-complex prot. 1 subunit $\beta$                                     |
| K F I D K Q L E L   | Mitofusin-2                                                           |
| L Y T E K F E E F   | Alpha-taxilin                                                         |
| K F I S P F T Q F   | Heparan-sulfate 6-O-sulfotransferase 3                                |
| N Y K S H H L Q L   | CWF19-like prot. 1                                                    |
| S Y L D V K Q R L   | ATP-bind. cassette sub-family E member 1                              |
| H Y V E K P S T F   | Mannose-1-phosphate guanyltransferase $\alpha$                        |
| T Y Q D I Q N T I   | DNA-directed RNA polymer. II subunit                                  |
| G V A V D L I L L   | Ataxin-10                                                             |
| K Y A R V V Q K L   | TATA-box-binding prot.                                                |
| K Y I Q R Q Q T I   | Interferon-induced GTP-bind. prot. Mx2                                |
| V Y S P H V L N L   | Dynamin-2                                                             |
| L V L D N A F Y K   | ADAM DEC1                                                             |
| S Y M G H F D L L   | Splicing factor 3B subunit 5                                          |
| K L K E K T Y S L   | Myotubularin-related prot. 6                                          |
| S Y L T V H K R I   | Zinc finger prot. 557                                                 |
| L Y S T I R P Y L   | RRP12-like prot.                                                      |
| L Y S S K L Y R F   | BTB/POZ domain-containing prot. KCTD20                                |
| Q Y P F H V P L L   | Lymphotoxin- $\alpha$                                                 |
| V Y I K H P V S L   | 26S proteasome non-ATPase regulatory subunit 8                        |
| I Y V I P Q P H F   | Prot. CASC5                                                           |
| K Y V K I F D N F   | Zinc finger prot. 195                                                 |
| I L K K K S F T F   | Pyridine nucleotide-disulfide oxidoreductase domain                   |
| Q Y L P H V A R L   | Surfeit locus prot. 4                                                 |
| H F L G N F K T K F | Phosphatidylinositol 4,5-bisphosphate 3-kinase catal., $\delta$ isof. |
| T F V D N I Q T A F | Integrator complex subunit 1                                          |
| K Y I F K E R E S F | Activating signal cointegrator 1 complex subunit 1                    |
| V Y K D H Q T I T I | DNA replication licensing factor MCM3                                 |
| K Y I D Q G I A E L | RuvB-like 1                                                           |
| T Y S P A L N K M F | Cellular tumor antigen p53                                            |
| K Y I T K S F N F Y | Poly(A)-specific ribonuclease PARN                                    |

|                       |                                                                    |
|-----------------------|--------------------------------------------------------------------|
| K Y L N Q T S R S F   | Squalene synthase                                                  |
| V F E D P V I S K F   | 28S ribosomal prot. S7, mitochondrial                              |
| L Y A D V G G K Q F   | Translocon-associated prot. subunit $\delta$                       |
| V Y A H I Y H Q H F   | MOB kinase activator 1a                                            |
| A F I R V V G S E F   | 26S protease regulatory subunit 6B                                 |
| Y F I T V V P T K L   | Endoplasmic reticulum-Golgi intermediate compartment prot. 2       |
| L Y L K V K G N V F   | 60S ribosomal prot. L19                                            |
| R Y F D P A N G K F   | Elongation factor 2                                                |
| I Y I S T L K T E F   | Activator of 90 kDa heat shock prot. ATPase homolog 1              |
| D Y V P P E L I T L   | Translation initiation factor eIF-2B subunit $\beta$               |
| I Y G E K F E D E N   | Peptidyl-prolyl cis-trans isomer. A                                |
| V Y N E N L V H M I   | Pre-mRNA-splicing factor SPF27                                     |
| R F L D D L G L K F   | Desmoglein-2                                                       |
| K Y I E T T P L T I   | Zinc finger prot. 638                                              |
| D Y L D G V H T V F   | Peptidyl-prolyl cis-trans isomer.-like 4                           |
| I Y P V D L G D K F   | DNA-directed RNA polymer. I, II, and III subunit RPABC3            |
| A Y I Q G L K E K F   | All-trans-retinol 13,14-reductase                                  |
| T Y P E G L E V L H F | Centromere prot. J                                                 |
| S Y I R P E D I V N F | Transmembrane prot. 183A                                           |
| R Y L P T E Q E V R F | FAD-dependent oxidoreductase domain-containing prot. 2             |
| K Y M P N V K V A V F | Spliceosome RNA helicase DDX39B                                    |
| K Y K N S E I N F S F | Prot.n phosphatase 1K, mitochondrial                               |
| K Y L P E N D L K R L | Ser/thr-prot. phosphatase 6 catalytic subunit                      |
| V L P G V D A L S N I | Phosphoglycerate kinase 1                                          |
| I Y L N H I E P L K I | Thymidylate synthase                                               |
| V Y V D L G G S H V F | Ribosome biogenesis prot. BMS1 homolog                             |
| I F Y A G T G N L L L | Coatomer subunit $\alpha$                                          |
| T Y L P A G Q S V L L | Prohibitin                                                         |
| K Y L D E D T I Y H L | S-adenosylmethionine synthase isof. type-2                         |
| R Y P T S I A S L A F | Mitotic checkpoint prot. BUB3                                      |
| R Y I S P D Q L A D L | Alpha-enolase                                                      |
| K F I D P K K I K V F | ATP-dependent RNA helicase DDX19A                                  |
| V F I H K D K G F G F | Non-POU domain-containing octamer-bind. prot.                      |
| T F P N I A S A T K F | Heme oxygenase 1                                                   |
| L Y P N I D K D H A F | Signal transducer and activator of transcription 1- $\alpha/\beta$ |
| V Y S Q I P A A V K L | E3 ubiquitin-prot. ligase UBR5                                     |
| R F A H G T A G L V F | Cytochrome c oxidase assembly prot. COX15 homolog                  |
| L Y E E G S N K R L F | Proteasome subunit $\alpha$ type-3                                 |
| K F F G K E L S T T L | Heat shock 70 kDa prot. 4                                          |
| R F V N V V P T F G K | 40S ribosomal prot. S30                                            |
| K Y I T Q G Q L L Q F | Elongation of very long chain fatty acids prot. 5                  |



|                                 |                                              |
|---------------------------------|----------------------------------------------|
| S Y L E R H G L I N F           | Lys-specific histone demethylase 1a          |
| I Y F P K K E A V T F           | Phospholipase A-2-activating prot.           |
| G F G D S R G G G G N F         | Heterogeneous nucl. ribonucleoprot. A2/B1    |
| V S E K G T V Q Q A D E         | 60S ribosomal prot. L9                       |
| Y F I D S T N L K T H F         | Zinc finger prot. 593                        |
| V Q T K G T G A S G S F         | Histone H1.1                                 |
| I Y E E T R G V L K V F         | Histone H4                                   |
| V Y I E S R I G T S T S F       | Kinesin-like prot. KIF20A                    |
| T F M A A G S S A P E L V T     | Sodium/potassium/calcium exchanger 5         |
| A K T D Q A Q K A E G A G D A   | Non-histone chromosomal prot. HMG-17         |
| I K D D E K E A E E G E D D R D | Heterogeneous nucl. ribonucleoprot. C-like 1 |

**origin: LCL 721.221 cells / High binding peptides (after TFA)**

| 1 | 2 | 3 | 4 | 5 | 6 | 7 | 8 | 9 | 10 | 11 | 12 | 13 | 14 | 15 | 16 | 17 | 18 |                                                           |
|---|---|---|---|---|---|---|---|---|----|----|----|----|----|----|----|----|----|-----------------------------------------------------------|
| Y | E | V | S | Q | L | K | D |   |    |    |    |    |    |    |    |    |    | Cytosolic non-specific dipeptidase                        |
| D | E | D | T | I | Y | H | L |   |    |    |    |    |    |    |    |    |    | S-adenosylmethionine synthase isof. type-2                |
| V | Y | N | E | N | L | V | H |   |    |    |    |    |    |    |    |    |    | Pre-mRNA-splicing factor SPF27                            |
| S | F | S | T | V | H | E | K | F |    |    |    |    |    |    |    |    |    | WD repeat-containing prot. 36                             |
| V | F | N | D | V | R | L | L | L |    |    |    |    |    |    |    |    |    | F-actin-capping prot. subunit $\alpha$ -1                 |
| K | F | I | D | T | T | S | K | F |    |    |    |    |    |    |    |    |    | 60S ribosomal prot. L3-like                               |
| L | T | E | A | P | L | N | P | K |    |    |    |    |    |    |    |    |    | Actin, cytoplasmic 1                                      |
| G | Y | S | N | R | V | V | D | L |    |    |    |    |    |    |    |    |    | Glyceraldehyde-3-phosphate dehydrogenase                  |
| A | Y | L | P | V | N | E | S | F |    |    |    |    |    |    |    |    |    | Elongation factor 2                                       |
| V | F | S | T | V | V | I | H | F |    |    |    |    |    |    |    |    |    | 3-hydroxy-3-methylglutaryl-coenzyme A reductase           |
| V | Y | V | Q | H | P | I | T | F |    |    |    |    |    |    |    |    |    | Lipopolysaccharide-induced tumor necrosis $\alpha$ factor |
| V | Y | V | V | G | T | A | H | F |    |    |    |    |    |    |    |    |    | TraB domain-containing prot.                              |
| K | Y | I | T | D | V | V | K | L |    |    |    |    |    |    |    |    |    | Small subunit processome component 20 homolog             |
| V | Y | S | P | H | V | L | N | L |    |    |    |    |    |    |    |    |    | Dynamin-1                                                 |
| Y | Y | E | E | Q | H | P | E | L |    |    |    |    |    |    |    |    |    | Interleukin-32                                            |
| P | F | V | D | H | V | F | T | F |    |    |    |    |    |    |    |    |    | Ribosome biogenesis prot. BRX1 homolog                    |
| L | Y | T | E | K | F | E | E | F |    |    |    |    |    |    |    |    |    | $\alpha$ -taxilin                                         |
| T | F | S | D | V | E | A | H | F |    |    |    |    |    |    |    |    |    | Zinc finger prot. 280C                                    |
| N | Y | G | V | L | H | V | T | F |    |    |    |    |    |    |    |    |    | NACHT, LRR and PYD domains-containing prot. 11            |
| A | Y | V | H | M | V | T | H | F |    |    |    |    |    |    |    |    |    | Bax inhibitor 1                                           |
| V | F | I | D | K | Q | T | N | L |    |    |    |    |    |    |    |    |    | CUGBP Elav-like family member 2                           |
| T | Y | I | T | S | V | S | R | L |    |    |    |    |    |    |    |    |    | Oxidative stress-induced growth inhibitor 2               |
| V | Y | V | Q | N | V | V | K | L |    |    |    |    |    |    |    |    |    | AP-3 complex subunit $\delta$ -1                          |
| K | Y | I | D | K | T | I | R | V |    |    |    |    |    |    |    |    |    | U6 snRNA-associated Sm-like prot. LSm7                    |
| T | Y | G | E | I | F | E | K | F |    |    |    |    |    |    |    |    |    | NADH dehydrogenase [ubiquinone] 1 subunit C2              |

|                                     |                                                                   |
|-------------------------------------|-------------------------------------------------------------------|
| S Y S D P P L K F                   | Heterogeneous nucl. ribonucleoprot. F                             |
| V F T G V V T K L                   | Cell division cycle and apoptosis regulator prot. 1               |
| P Y V N N V P H L                   | Methionine--tRNA ligase, cytoplasmic                              |
| N Y I H V G A Q L                   | Unconventional myosin-Id                                          |
| L V N S A A H L F                   | Acyl-CoA desaturase                                               |
| E Y L T K V D K L                   | Clathrin hc 1                                                     |
| K Y I G E N L Q L                   | 60S ribosome subunit biogenesis prot. NIP7 homolog                |
| G Y I H V T Q T F                   | Prot. NKG7                                                        |
| K Y I D Q K F V L                   | Ser/thr-prot. phosphatase 2A 56 kDa regul. subunit $\delta$ isof. |
| A Y L E A H E T F                   | Nucl. pore complex prot. Nup107                                   |
| Q Y V D F H N Q L                   | DNA repair prot. complementing XP-G cells                         |
| S Y L D R T E Q L                   | WD repeat-containing prot. 18                                     |
| K Y I Q R Q E T I                   | Interferon-induced GTP-binding prot. Mx1                          |
| I Y G E K T Y A F                   | Serpin B10                                                        |
| K Y L S G I A H F                   | Mitochondrial-processing peptidase subunit $\alpha$               |
| K Y Q E V T N N L                   | Caprin-1                                                          |
| T Y L E K A I K I                   | Ubiquitin carboxyl-terminal hydrolase 7                           |
| I Y I K Q I K T F                   | Retinoblastoma-like prot. 2                                       |
| K Y T P P P H H I                   | NADH dehydrogenase [ubiquinone] iron-sulfur prot. 5               |
| R Y G L V T N E I                   | Interferon-induced helicase C domain-containing prot. 1           |
| K Y L N Q T S R S F                 | Squalene synthase                                                 |
| A Y V K G G L S T F                 | Exocyst complex component 2                                       |
| Y Y F E G I K Q T F                 | Activator of 90 kDa heat shock prot. ATPase homolog 1             |
| I F L P I L R T G F                 | DNA replication licensing factor MCM7                             |
| V L L A P G F Q I P P               | Dynein heavy chain 17, axonemal                                   |
| I L E L A G N A A R D               | Histone H2A type 2-A                                              |
| I Y E D P Q H H P L L               | DDB1- and CUL4-associated factor 7                                |
| T F P N I A S A T K F               | Heme oxygenase 1                                                  |
| R Y I S P D Q L A D L               | $\alpha$ -enolase                                                 |
| I Y V N P A N T H Q F               | DDB1- and CUL4-associated factor 8                                |
| T Y L P A G Q S V L L               | Prohibitin                                                        |
| K F F G K D I S T T L               | Heat shock prot. 105 kDa                                          |
| R Y P T S I A S L A F               | Mitotic checkpoint prot. BUB3                                     |
| R Y L P P A T Q V V L               | Eukaryotic initiation factor 4A-III                               |
| I K P S V E P S A G H D E L         | Stromal cell-derived factor 2-like prot. 1                        |
| Q V T Q P T V G M N F K T P R G P V | 40S ribosomal prot. S17-like                                      |

origin: LCL 721.220 cells / Low binding peptides (before TFA)

| 1 | 2 | 3 | 4 | 5 | 6 | 7 | 8 | 9 | 10 | 11 | 12 | 13 | 14 |                                                                       |
|---|---|---|---|---|---|---|---|---|----|----|----|----|----|-----------------------------------------------------------------------|
| I | Y | D | P | N | L | A | F |   |    |    |    |    |    | 1-phosphatidylinositol 4,5-bisphosphate phosphodiesterase $\gamma$ -2 |
| S | A | R | I | Q | D | A | L |   |    |    |    |    |    | Eukaryotic translation initiation factor 3 subunit F                  |
| I | S | P | H | G | N | A | L |   |    |    |    |    |    | ATP-depend. Clp protease ATP-bind. subunit clpX-like                  |
| F | E | G | P | P | F | K | F |   |    |    |    |    |    | WD repeat-containing protein 1                                        |
| I | Y | N | E | A | L | K | G |   |    |    |    |    |    | Prot. S100-A6                                                         |
| I | Y | A | P | P | L | P | S | L |    |    |    |    |    | A-kinase anchor prot. 1, mitochondrial                                |
| I | F | K | D | K | P | I | K | L |    |    |    |    |    | SH3 domain-containing kinase-bind. prot. 1                            |
| V | F | L | R | A | I | N | K | F |    |    |    |    |    | Dedicator of cytokinesis prot. 2                                      |
| T | Y | L | E | K | A | I | K | I |    |    |    |    |    | Ubiquitin carboxyl-terminal hydrolase 7                               |
| I | Y | I | K | H | P | H | L | F |    |    |    |    |    | Deoxynucleotidyltransferase terminal-interacting prot. 1              |
| V | Y | P | D | G | I | R | H | I |    |    |    |    |    | Splicing factor 3B subunit 3                                          |
| V | Y | V | K | H | S | I | S | F |    |    |    |    |    | AP-3 complex subunit mu-1                                             |
| L | I | D | R | P | A | P | H | F |    |    |    |    |    | Band 4.1-like prot. 2                                                 |
| V | G | P | P | G | R | S | S | L |    |    |    |    |    | Nuclear pore complex prot. Nup93                                      |
| N | Y | I | D | K | V | R | F | L |    |    |    |    |    | Vimentin                                                              |
| Y | Y | I | F | I | P | S | K | F |    |    |    |    |    | Probable ATP-dependent RNA helicase DDX47                             |
| T | Y | H | P | G | V | P | V | F |    |    |    |    |    | Cys and his-rich domain-containing prot. 1                            |
| K | Y | I | S | K | P | E | N | L |    |    |    |    |    | Calcium-bind. prot. 39                                                |
| F | Y | I | S | P | V | N | K | L |    |    |    |    |    | Late secretory pathway prot. AVL9 homolog                             |
| L | Y | T | E | K | F | E | E | F |    |    |    |    |    | $\alpha$ -taxilin                                                     |
| L | V | N | S | A | A | H | L | F |    |    |    |    |    | Acyl-CoA desaturase                                                   |
| S | F | S | T | V | H | E | K | F |    |    |    |    |    | WD repeat-containing prot. 36                                         |
| D | Y | V | E | G | L | R | V | F |    |    |    |    |    | Myosin light polypeptide 6                                            |
| I | Y | G | E | K | T | Y | A | F |    |    |    |    |    | Serpin B10                                                            |
| T | F | S | D | V | E | A | H | F |    |    |    |    |    | Zinc finger prot. 280C                                                |
| V | Y | Q | H | L | F | T | R | I |    |    |    |    |    | AP-5 complex subunit $\zeta$ -1                                       |
| K | F | I | D | T | T | S | K | F |    |    |    |    |    | 60S ribosomal prot. L3-like                                           |
| I | L | T | E | R | G | Y | S | F |    |    |    |    |    | Actin, cytoplasmic 1                                                  |
| I | Y | I | A | G | H | P | A | F |    |    |    |    |    | Heterogeneous nucl. ribonucleoprot. L                                 |
| V | F | I | D | K | Q | T | N | L |    |    |    |    |    | CUGBP Elav-like family member 2                                       |
| A | Y | V | H | M | V | T | H | F |    |    |    |    |    | Bax inhibitor 1                                                       |
| V | Y | V | V | G | T | A | H | F |    |    |    |    |    | TraB domain-containing prot.                                          |
| T | Y | G | E | I | F | E | K | F |    |    |    |    |    | NADH dehydrogenase [ubiquinone] 1 subunit C2                          |
| V | Y | S | P | H | V | L | N | L |    |    |    |    |    | Dynamin-1                                                             |
| V | F | T | G | V | V | T | K | L |    |    |    |    |    | Cell division cycle and apoptosis regulator prot. 1                   |
| D | Y | G | I | V | A | D | L | F |    |    |    |    |    | Electron transfer flavoprotein subunit $\alpha$ , mitochondrial       |
| K | Y | I | N | T | D | A | K | F |    |    |    |    |    | Short transient receptor potential channel 4-associated prot.         |
| V | Y | G | P | L | P | Q | S | F |    |    |    |    |    | Cytochrome c oxidase subunit 4 isof. 1, mitochondrial                 |

H Y V P A T K V F  
 P F L D I Q K R F  
 P F V D H V F T F  
 V Y I K H P V S L  
 P F L P K P L F F  
 E Y I A V V K K L  
 I Y I K Q I K T F  
 F Y P P K V E L F  
 N Y G V L H V T F  
 I Y V H D L L T F  
 Y Y E E Q H P E L  
 E F P S I K T E F  
 K Y I D Q K F V L  
 Y Y K N I G L G F  
 S Y I S R T N Q L  
 V Y E R E L Q T F  
 E Y L K I K Q S F  
 P F I D S Q H V I  
 I Y Q R H V Y N L  
 P Y V N N V P H L  
 K Y I D K T I R V  
 E F I N T T A R V  
 V A E E H L T V D  
 I F H E V P L K F  
 I L K K K S F T F  
 T Y Q D I Q N T I  
 K Y I S G P H E L  
 T Y V S G T L R F  
 N F T N V A A T F  
 S T L D P K T I S F  
 T I I G E S I S R L  
 Y Y F E G I K Q T F  
 L Y A D V G G K Q F  
 V Y V Q I H P I T F  
 R Y F D P A N G K F  
 V F E D P V I S K F  
 I F L P I L R T G F  
 L Y L K V K G N V F  
 A F I R V V G S E F  
 V Y V D L G G S H V F  
 H Y F Q N T Q G L I F  
 T F P N I A S A T K F

L-amino-acid oxidase  
 NADH dehydrogenase [ubiquinone] iron-sulfur prot. 5  
 Ribosome biogenesis protein BRX1 homolog  
 26S proteasome non-ATPase regulatory subunit 8  
 Ribosomal RNA processing prot. 1 homolog B  
 Acyl-CoA-binding domain-containing prot. 6  
 Retinoblastoma-like prot. 2  
 Multifunctional prot. ADE2  
 NACHT, LRR and PYD domains-containing prot. 11  
 Vam6/Vps39-like prot.  
 Interleukin-32  
 Centromere-associated prot. E  
 Ser/thr-prot. phosphatase 2A 56 kDa regul.subunit  $\delta$  isof.  
 40S ribosomal prot. S11  
 Prot. ELYS  
 Methyltransferase-like prot. 10  
 E3 ubiquitin-prot. ligase RNF180  
 Dolichol phosphate-mannose biosynthesis regulatory prot.  
 Transmembrane prot. 209  
 Methionine-tRNA ligase, cytoplasmic  
 U6 snRNA-associated Sm-like prot. LSm7  
 Lactoperoxidase  
 ADP-sugar pyrophosphatase  
 NMDA receptor-regulated prot. 2  
 Pyridine nucleot.-disulf. oxidoreduct. prot. 1  
 DNA-directed RNA polymerase II subunit RPB1  
 Centromere prot. F  
 Choline/ethanolaminephosphotransfer. 1  
 ATP-citrate synthase  
 Acyl-coenzyme A thioesterase 9, mitochondrial  
 Arginine-tRNA ligase, cytoplasmic  
 Activator of 90 kDa heat shock prot. ATPase homolog 1  
 Translocon-associated prot. subunit  $\delta$   
 Lipopolysaccharide-induced tumor necrosis  $\alpha$  factor  
 Elongation factor 2  
 28S ribosomal prot. S7, mitochondrial  
 DNA replication licensing factor MCM7  
 60S ribosomal prot. L19  
 26S protease regulatory subunit 6B  
 Ribosome biogenesis prot. BMS1 homolog  
 ADP-ribosylation factor 1  
 Heme oxygenase 1

|   |   |   |   |   |   |   |   |   |   |   |   |   |   |  |  |  |  |  |                                                                    |
|---|---|---|---|---|---|---|---|---|---|---|---|---|---|--|--|--|--|--|--------------------------------------------------------------------|
| T | Y | L | P | A | G | Q | S | V | L | L |   |   |   |  |  |  |  |  | Prohibitin                                                         |
| K | F | L | D | A | G | H | K | L | N | F |   |   |   |  |  |  |  |  | Prot. disulfide-isomer. A3                                         |
| V | F | I | H | K | D | K | G | F | G | F |   |   |   |  |  |  |  |  | Non-POU domain-containing octamer-bind. prot.                      |
| K | F | F | G | K | D | I | S | T | T | L |   |   |   |  |  |  |  |  | Heat shock prot. 105 kDa                                           |
| K | Y | L | D | E | D | T | I | Y | H | L |   |   |   |  |  |  |  |  | S-adenosylmethionine synthase isof. type-2                         |
| R | Y | P | T | S | I | A | S | L | A | F |   |   |   |  |  |  |  |  | Mitotic checkpoint prot. BUB3                                      |
| R | F | L | N | A | E | N | A | Q | K | F |   |   |   |  |  |  |  |  | Ran-specific GTPase-activating prot.                               |
| V | L | P | E | G | G | E | T | P | L | F |   |   |   |  |  |  |  |  | Gelsolin                                                           |
| G | V | L | K | P | G | M | V | V | T | F |   |   |   |  |  |  |  |  | Elongation factor 1- $\alpha$ 1                                    |
| R | Y | I | S | P | D | Q | L | A | D | L |   |   |   |  |  |  |  |  | Alpha-enolase                                                      |
| T | Y | V | P | V | T | T | F | K | N | L |   |   |   |  |  |  |  |  | 60S ribosomal prot. L31                                            |
| R | F | V | N | V | V | P | T | F | G | K |   |   |   |  |  |  |  |  | 40S ribosomal prot. S30                                            |
| I | Y | E | D | P | Q | H | H | P | L | L |   |   |   |  |  |  |  |  | DDB1- and CUL4-associated factor 7                                 |
| F | Y | V | P | A | E | P | K | L | A | F |   |   |   |  |  |  |  |  | 60S ribosomal prot. L7                                             |
| G | Y | Q | R | D | G | Y | Q | Q | N | F |   |   |   |  |  |  |  |  | Caprin-1                                                           |
| L | Y | P | N | I | D | K | D | H | A | F |   |   |   |  |  |  |  |  | Signal transducer and activator of transcription 1- $\alpha/\beta$ |
| Y | F | I | D | S | T | N | L | K | T | H | F |   |   |  |  |  |  |  | Zinc finger prot. 593                                              |
| I | Y | I | D | S | N | N | N | P | E | R | F |   |   |  |  |  |  |  | Clathrin hc 1                                                      |
| N | F | G | F | G | D | S | R | G | G | G | G | N | F |  |  |  |  |  | Heterogeneous nucl. ribonucleoprot. A2/B1                          |

**origin: LCL 721.220 cells / High binding peptides (after TFA)**

| <b>1</b> | <b>2</b> | <b>3</b> | <b>4</b> | <b>5</b> | <b>6</b> | <b>7</b> | <b>8</b> | <b>9</b> | <b>10</b> | <b>11</b> | <b>12</b> | <b>13</b> | <b>14</b> | <b>15</b> |  |  |  |  |                                                      |
|----------|----------|----------|----------|----------|----------|----------|----------|----------|-----------|-----------|-----------|-----------|-----------|-----------|--|--|--|--|------------------------------------------------------|
| F        | V        | Q        | M        | M        | T        | A        | K        |          |           |           |           |           |           |           |  |  |  |  | Calmodulin                                           |
| L        | V        | D        | V        | E        | P        | K        | V        |          |           |           |           |           |           |           |  |  |  |  | Small nuclear ribonucleoprot. Sm D1                  |
| G        | Y        | S        | N        | R        | V        | V        | D        | L        |           |           |           |           |           |           |  |  |  |  | Glyceraldehyde-3-phosphate dehydrogenase             |
| K        | F        | I        | D        | T        | T        | S        | K        | F        |           |           |           |           |           |           |  |  |  |  | 60S ribosomal prot. L3-like                          |
| Y        | Y        | E        | E        | Q        | H        | P        | E        | L        |           |           |           |           |           |           |  |  |  |  | Interleukin-32                                       |
| V        | F        | I        | D        | K        | Q        | T        | N        | L        |           |           |           |           |           |           |  |  |  |  | CUGBP Elav-like family member 2                      |
| L        | Y        | E        | V        | S        | Q        | L        | K        | D        |           |           |           |           |           |           |  |  |  |  | Cytosolic non-specific dipeptidase                   |
| A        | Y        | V        | H        | M        | V        | T        | H        | F        |           |           |           |           |           |           |  |  |  |  | Bax inhibitor 1                                      |
| T        | Y        | G        | E        | I        | F        | E        | K        | F        |           |           |           |           |           |           |  |  |  |  | NADH dehydrogenase [ubiquinone] 1 subunit C2         |
| V        | Y        | I        | K        | H        | P        | V        | S        | L        |           |           |           |           |           |           |  |  |  |  | 26S proteasome non-ATPase regulatory subunit 8       |
| V        | F        | V        | D        | R        | T        | L        | D        | L        |           |           |           |           |           |           |  |  |  |  | Sec1 family domain-containing prot. 2                |
| N        | V        | E        | W        | A        | K        | P        | S        | T        | N         |           |           |           |           |           |  |  |  |  | Eukaryotic translation initiation factor 3 subunit G |
| I        | L        | E        | L        | A        | G        | N        | A        | A        | R         | D         |           |           |           |           |  |  |  |  | Histone H2A type 2-A                                 |
| A        | A        | L        | E        | K        | E        | A        | Q        | T        | S         | F         |           |           |           |           |  |  |  |  | ATP-dependent RNA helicase DDX1                      |
| R        | Y        | I        | S        | P        | D        | Q        | L        | A        | D         | L         |           |           |           |           |  |  |  |  | Alpha-enolase                                        |
| T        | Y        | V        | P        | V        | T        | T        | F        | K        | N         | L         |           |           |           |           |  |  |  |  | 60S ribosomal prot. L31                              |
| F        | Q        | I        | N        | Q        | D        | E        | E        | E        | E         | D         | E         | D         |           |           |  |  |  |  | 60S ribosomal prot. L22                              |
| N        | F        | G        | F        | G        | D        | S        | R        | G        | G         | G         | G         | N         | F         |           |  |  |  |  | Heterogeneous nuclear ribonucleoprot. A2/B1          |

I K P S V E P S A G H D E L  
Y A S G R T T G I V M D S G D  
L V S N L N P E R V T P Q S L

Stromal cell-derived factor 2-like prot. 1  
Actin, cytoplasmic 1  
Polypyrimidine tract-bind. prot. 1
